# Supplementary material for: Delivery room interventions to prevent bronchopulmonary dysplasia in preterm infants: a protocol for a systematic review and network meta-analysis
Source: PubMed Central journal article supplement — BMJ Open. 2019 Aug 18;9(8):e028066. doi: 10.1136/bmjopen-2018-028066 (PMC6701811; doi:10.1136/bmjopen-2018-028066), 2019-08-18
Supplement: bmjopen-2018-028066.draft_revisions.pdf [file bmjopen-2018-028066.draft_revisions.pdf]

# BMJ Open

BMJ Open is committed to open peer review. As part of this commitment we make the peer review history of every article we publish publicly available.

When an article is published we post the peer reviewers' comments and the authors' responses online. We also post the versions of the paper that were used during peer review. These are the versions that the peer review comments apply to.

The versions of the paper that follow are the versions that were submitted during the peer review process. They are not the versions of record or the final published versions. They should not be cited or distributed as the published version of this manuscript.

BMJ Open is an open access journal and the full, final, typeset and author-corrected version of record of the manuscript is available on our site with no access controls, subscription charges or pay-per-view fees (<http://bmjopen.bmj.com>).

If you have any questions on BMJ Open's open peer review process please email [info.bmjopen@bmj.com](mailto:info.bmjopen@bmj.com)

# BMJ Open

## Delivery Room Interventions to Prevent Bronchopulmonary Dysplasia in Preterm Infants: A Protocol for a Systematic Review and Network Meta-Analysis

|                               |                                                                                                                                                                                                                                                                                                                                                                                                                                                                                                                                                                                                                                                                                                                                                                                                          |
|-------------------------------|----------------------------------------------------------------------------------------------------------------------------------------------------------------------------------------------------------------------------------------------------------------------------------------------------------------------------------------------------------------------------------------------------------------------------------------------------------------------------------------------------------------------------------------------------------------------------------------------------------------------------------------------------------------------------------------------------------------------------------------------------------------------------------------------------------|
| Journal:                      | <i>BMJ Open</i>                                                                                                                                                                                                                                                                                                                                                                                                                                                                                                                                                                                                                                                                                                                                                                                          |
| Manuscript ID                 | bmjopen-2018-028066                                                                                                                                                                                                                                                                                                                                                                                                                                                                                                                                                                                                                                                                                                                                                                                      |
| Article Type:                 | Protocol                                                                                                                                                                                                                                                                                                                                                                                                                                                                                                                                                                                                                                                                                                                                                                                                 |
| Date Submitted by the Author: | 21-Nov-2018                                                                                                                                                                                                                                                                                                                                                                                                                                                                                                                                                                                                                                                                                                                                                                                              |
| Complete List of Authors:     | Mitra, Souvik; Dalhousie University, IWK Health Center, Department of Pediatrics<br>Disher, Timothy; School of Nursing, Dalhousie University<br>Pichler, Gerhard; Medical University of Graz, Research Unit for Neonatal Micro- and Macrocirculation, Department of Pediatrics<br>D'Souza, Brandon; IWK Health Centre, Department of Respiratory Therapy<br>Mccord, Helen; Dalhousie University, IWK Health Center, Department of Pediatrics<br>Chayapathi, Varsha; Dalhousie University, IWK Health Center, Department of Pediatrics<br>Jones, Karlee; Dalhousie University, IWK Health Center, Department of Pediatrics<br>Schmölzer, Georg; Royal Alexandra Hospital, Centre for the Studies of Asphyxia and Resuscitation, Neonatal Research Unit, ; University of Alberta, Department of Pediatrics |
| Keywords:                     | Infants, Bronchopulmonary dysplasia, Delivery Room, Newborn                                                                                                                                                                                                                                                                                                                                                                                                                                                                                                                                                                                                                                                                                                                                              |
|                               |                                                                                                                                                                                                                                                                                                                                                                                                                                                                                                                                                                                                                                                                                                                                                                                                          |

SCHOLARONE™  
Manuscripts

1  
2  
3 **Delivery Room Interventions to Prevent Bronchopulmonary Dysplasia in Preterm**  
4  
5 **Infants: A Protocol for a Systematic Review and Network Meta-Analysis**  
6

7 Souvik Mitra MD MSc<sup>1</sup>, Tim Disher PhD(c), RN<sup>2</sup>, Gerhard Pichler MD<sup>3</sup>, Brandon D'Souza BHSc,  
8 RRT<sup>6</sup>, Helen Mccord MN<sup>1</sup>, Varsha Chayapathi MBBS, DNB<sup>1</sup>, Karlee Jones BScPharm, ACPR<sup>1</sup>,  
9  
10 Georg M. Schmölzer MD, PhD<sup>4,5</sup>  
11  
12

13  
14  
15 <sup>1</sup>Department of Pediatrics, Dalhousie University, IWK Health Center, Halifax, Canada

16  
17 <sup>2</sup>School of Nursing, Dalhousie University, Halifax Nova Scotia, Canada

18  
19 <sup>3</sup>Research Unit for Neonatal Micro- and Macrocirculation, Department of Pediatrics, Medical  
20 University of Graz, Austria  
21

22  
23  
24 <sup>4</sup>Centre for the Studies of Asphyxia and Resuscitation, Neonatal Research Unit, Royal Alexandra  
25 Hospital, Edmonton, Alberta, Canada  
26

27  
28 <sup>5</sup>Department of Pediatrics, University of Alberta, Edmonton, Alberta, Canada  
29

30  
31 <sup>6</sup>Department of Respiratory Therapy, IWK Health Centre, Halifax, Nova Scotia, Canada  
32

33  
34  
35 **Corresponding author:**  
36

37 Georg M. Schmölzer, MD, PhD

38  
39 Centre for the Studies of Asphyxia and Resuscitation,  
40

41  
42 Neonatal Research Unit, Royal Alexandra Hospital,  
43

44  
45 10240 Kingsway Avenue NW,  
46

47  
48 T5H 3V9, Edmonton, Alberta, Canada

49  
50 Telephone +1 780 735 4660

51  
52 Fax: +1 780 735 4072

53  
54 Email: [georg.schmoelzer@me.com](mailto:georg.schmoelzer@me.com)  
55  
56  
57  
58  
59  
60

**Conflict of Interest:**

SM, GP, VC, have declared no conflict of interest. TD provides methodological advice for Cornerstone Research Group Inc. Cornerstone Research Group Inc. consults for various pharmaceutical and medical device companies. BD has provided device training and educational presentations to clinicians on behalf of Mallinckrodt Pharmaceuticals. GMS has registered the RETAIN neonatal resuscitation board (Tech ID 2017083) and RETAIN neonatal resuscitation video game (Tech ID 2017086) under Canadian copyright, and GMS is the owner of RETAIN Labs Inc. (<https://www.playretain.com>), which is distributing these games.

**Keywords:** INFANTS, NEWBORN, DELIVERY ROOM, BRONCHOPULMONARY DYSPLASIA

**Funding sources**

We would like to thank the public for donating money to our funding agencies: GMS is a recipient of the Heart and Stroke Foundation/University of Alberta Professorship of Neonatal Resuscitation, a National New Investigator of the Heart and Stroke Foundation Canada and an Alberta New Investigator of the Heart and Stroke Foundation Alberta. This research has been facilitated by the Women and Children's Health Research Institute through the generous support of the Stollery Children's Hospital Foundation.

**Abstract: 250 words**

**Manuscript: 3,963 words**

**Tables: 1**

**Figures: 1****Author's contribution:**

Conception and design: GMS, SM

Data analysis plan: GMS, SM, GP, TD, BDS, HM, VC, KJ

Drafting of the article: GMS, SM, GP, TD, BDS, HM, VC, KJ

Critical revision of the article for important intellectual content: GMS, SM, GP, TD, BDS, HM, VC, KJ

Final approval of the article: GMS, SM, GP, TD, BDS, HM, VC, KJ

The Corresponding Author has the right to grant on behalf of all authors and does grant on behalf of all authors, an exclusive licence (or non-exclusive for government employees) on a worldwide basis to the BMJ Publishing Group Ltd and its Licensees to permit this article (if accepted) to be published in BMJ Open and any other BMJ PGL products to exploit all subsidiary rights, as set out in our licence <http://authors.bmj.com/submitting-your-paper/copyright-and-authors-rights/> and the Corresponding Author accepts and understands that any supply made under these terms is made by BMJ PGL to the Corresponding Author. Where the Corresponding Author wishes to make the article available on an open access basis (and intends to pay the relevant open access fee), the terms of such open access shall be governed by a [Creative Commons](#) licence – details of these licences and which Creative Commons licence will apply to this article are set out in our licence referred to above.

**Abbreviations:**

|           |                                                                                 |
|-----------|---------------------------------------------------------------------------------|
| BPD       | - Bronchopulmonary dysplasia                                                    |
| ELGAN     | - Extremely low gestational age newborns                                        |
| IQ        | - Intelligence quotient                                                         |
| CPAP      | - Continuous positive airway pressure                                           |
| NMA       | - Network meta-analysis                                                         |
| RE        | - Random-effects model                                                          |
| RCT       | - Randomized controlled trials                                                  |
| INSURE    | - Intubate-Surfactant-Extubate technique                                        |
| LISA/MIST | - Less-invasive surfactant administration/minimally invasive surfactant therapy |
| ROB       | - Risk of bias                                                                  |
| CrIs      | - Credible intervals                                                            |
| RR        | - Risk ratio                                                                    |
| SUCRA     | - Surface Under the Cumulative Ranking curve                                    |
| FE        | - Fixed-effect model                                                            |
| FOL       | - First-order loops                                                             |
| SMAA      | - Stochastic multicriteria acceptability analysis                               |

**Abstract****Introduction**

As gestational age decreases, incidence of bronchopulmonary dysplasia (BPD) and chronic lung disease increases. There are many interventions used in the delivery room to prevent acute lung injury and consequently BPD in these patients. The availability of different treatment options often poses a practical challenge to the practicing neonatologist when it comes to making an evidence based choice as the multitude of pairwise systematic reviews including Cochrane reviews that are currently available only provide a narrow perspective through head-to-head comparisons.

**Methods and Analysis**

To overcome this challenge, this review will use Bayesian network meta-analysis approach which allows the comparison of the multiple delivery room interventions for prevention of BPD. This systematic review will summarize the available evidence from randomized clinical trials using a Bayesian network meta-analysis to determine the effectiveness and safety of delivery room interventions for prevention of BPD.

**Ethics and Dissemination**

The proposed protocol is a network meta-analysis, which has been registered on PROSPERO International prospective register of systematic reviews (CRD42018078648). We hope that this review will provide an evidence based guide to choosing the right sequence of early postnatal interventions that will be associated with the least likelihood of inducing lung injury and BPD in preterm infants.

## Strengths and limitations of this study

### Strengths:

- Comprehensive search to include published randomized clinical trials in the most important databases, as well as unpublished work
- Use the novel method for rating the confidence in the estimates recommended by the GRADE working group
- We will employ a novel Stochastic multicriteria acceptability analysis model to determine the most effective sequence of delivery room interventions with respect to the most important clinical outcomes

### Limitations:

- We anticipate some degree of clinical heterogeneity while considering such a large number of competing and non-competing delivery room interventions
- Potential to lump interventions into single nodes or split a node into multiple nodes to generate clinically meaningful results



## Introduction

Bronchopulmonary dysplasia (BPD) is the most common chronic respiratory morbidity associated with premature birth. BPD is defined as either need of supplemental oxygen at i) 28 days postnatal age(1), or ii) 36 weeks' postmenstrual age with or without compatible clinical and radiographic findings(2). BPD affects 30-60% of prematurely born infants with the incidence being inversely proportional to gestational age(3). With increased survival of extremely low gestational age newborns (ELGAN), the incidence of BPD continues to increase despite improvement in neonatal care practices over the last two decades(3). BPD is known to be associated with long-term respiratory morbidity that persists into adolescence and adulthood(4,5). There is also increasing evidence that BPD and duration on supplemental oxygen have long-term adverse effects on cognitive and academic achievement with each percent increase in BPD rate being associated with a 0.01 standard deviation decrease in intelligence quotient (IQ) (0.15 IQ points) ( $p < 0.001$ )(6,7).

Several antenatal, perinatal, and postnatal factors contribute to the development of BPD. It is postulated that early lung injury and inflammation play an important role in the pathogenesis of BPD (8,9). In the fetus, the gas exchange organ is the placenta and the function of gas exchange is transferred from the placenta to the lungs immediately after birth. Therefore, the newborn infant's lungs must open and be aerated to allow the transition from fetal to postnatal circulation and physiology. However, in ELGANs, several physiological factors prevent this transition. These include lack of surfactant leading to increased alveolar surface tension, non-compliant chest wall, and weak respiratory muscles(10-12). Therefore, most ELGANs require assisted ventilation and/or supplemental oxygen after birth to ensure optimal gas exchange. However, both therapies may also induce lung inflammation due to barotrauma and/or volutrauma and oxygen-free radical generation thereby initiating the pathogenesis of BPD. Therefore, any interventions targeted at limiting lung injury and oxidative stress during resuscitation in the delivery room immediately after the birth may help to prevent the development of BPD or reduce its severity.

A number of clinical trials have been conducted on a variety of delivery room interventions, including i) interventions prior to initiating breathing support (i.e., clamping vs. milking the umbilical cord); ii) interventions around initial breathing support (i.e., continuous positive airway pressure (CPAP), non-invasive positive pressure ventilation, sustained lung inflation or endotracheal intubation); iii) interventions related to improving lung compliance (i.e., prophylactic

1  
2  
3 surfactant therapy including the different variations in its administration modalities); iv)  
4 interventions related to minimizing oxidative stress (i.e., higher vs. lower oxygen saturation  
5 targets), v) use of cerebral oximetry, and vi) other potentially beneficial therapies such as caffeine  
6 administration (Figure 1)(13,14).  
7  
8  
9

10 The availability of multiple potential interventions in a resuscitation scenario often poses  
11 a practical challenge to health care professionals as to which sequence of interventions would  
12 provide the greatest likelihood of minimizing BPD and which interventions are unnecessary and  
13 unlikely to be of any benefit(13). There have been previous systematic reviews and pairwise meta-  
14 analyses on the different competing interventions such as initial breathing support and oxygen  
15 saturation targets(15-17). However, these meta-analyses, though well conducted, provide a narrow  
16 perspective to the situation where a sequence of non-competing interventions occur within a short  
17 time-frame whereas each intervention has potentially competing variations. Use of a network  
18 meta-analysis (NMA) framework may help to provide a more feasible, comprehensive and  
19 evidence-based solution to the dilemma that health care professionals face during resuscitation of  
20 ELGANs with regards to multiple competing interventions aimed at mitigating lung injury. The  
21 Cochrane handbook considers NMA as a highly valuable tool to evaluate and rank treatment  
22 options according to their safety and effectiveness(18). Bayesian NMA have been proposed as an  
23 effective method for evaluating the effectiveness of multiple competing interventions(18-20).  
24 Delivery room interventions consist of a sequence of non-competing category of interventions and  
25 within each category there are several potentially competing interventions (Figure 1). Given that  
26 many of these competing delivery room interventions have not been compared in head-to-head  
27 studies, we expect that some of the possible comparisons between the interventions will not have  
28 direct evidence. Hence, we will perform a random effects network meta-analysis (NMA). Delivery  
29 room interventions will be defined as all potential interventions in the immediate postnatal  
30 period(21-23).  
31  
32  
33  
34  
35  
36  
37  
38  
39  
40  
41  
42  
43  
44  
45  
46  
47

## 48 **OBJECTIVES**

49 To determine the relative effectiveness of commonly practiced delivery room interventions  
50 for preterm infants born <33 weeks of gestation in preventing BPD using a Bayesian network  
51 meta-analysis.  
52  
53  
54  
55  
56  
57  
58  
59  
60

## METHODS & DESIGN

This systematic review and NMA protocol has been registered on PROSPERO International prospective register of systematic reviews (CRD42018078648). This protocol was developed following the Preferred reporting items for systematic review and meta-analysis protocols (PRISMA-P) guidance(24). The final report will comply with the recommendations of the PRISMA Extension Statement for Reporting of Systematic Reviews Incorporating Network Meta-analyses of Health Care Interventions(25).

### Search Strategy

We will search from their inception to August 2018, the following databases: MEDLINE, EMBASE and the Cochrane Central Register of Controlled Trials (CENTRAL). We will use combination of controlled terms (Medical Subject Heading, MeSH, and Emtree), and free-text terms with various synonyms for the different possible delivery room interventions and BPD. Search alerts will be set up for monthly notification and the search will be repeated before the final manuscript submission to identify any new relevant trials. Search strategies have been developed with liaison with an experienced librarian. No language, publication status or date limit will be used. The search strategies have been detailed in appendix A.

We will seek registered details of selected trials in the U.S. National Institutes of Health resource ([www.clinicaltrials.gov](http://www.clinicaltrials.gov)) and the WHO International Clinical Trials Registry Platform Search Portal. We intend to obtain additional grey literature from personal communication from experts in the field, reviewing the reference lists of relevant articles, abstracts and conference proceedings (Society for Pediatric Research, European Society for Pediatric Research) and seeking results of unpublished trials. We intend to contact authors of unpublished work and authors of published trials in order to clarify information that is not clear in the articles.

### Eligibility Criteria

We will include randomized controlled trials (RCTs) that evaluate the effectiveness of commonly practiced delivery room interventions. Studies will have to have the following characteristics regarding participants, intervention, control and type of study.

- a) Participants: Preterm infants (<33 weeks) requiring intervention(s) during neonatal transition within the golden hours after birth

- 1  
2  
3 b) Interventions include the following: i) cord management (including immediate cord clamping,  
4 delayed cord clamping, cord milking, and/or resuscitation attached to the cord); ii) respiratory  
5 support (including positive pressure ventilation, CPAP, sustained lung inflation, and/or  
6 intubation, and mechanical ventilation); iii) surfactant delivery (type of surfactant delivered  
7 via endotracheal tube or laryngeal mask, INSURE (Intubate-Surfactant-Extubate) technique,  
8 LISA/MIST (less-invasive surfactant administration/minimally invasive surfactant therapy),  
9 and/or nebulized surfactant administration; iv) initial fractional concentration of inspired  
10 oxygen ( $FiO_2$ ) ( $\leq 0.3$  or  $\geq 0.6$ ); v) monitoring during resuscitation (respiratory function monitor,  
11 near-infrared spectroscopy); vi) medication (e.g., caffeine citrate, or diuretics); vii) use of  
12 heated, humidified gas  
13  
14 c) Comparator: One or more of the above interventions compared to each other or no treatment.  
15 Since interventions possible in a delivery room are largely related to delivery room resources, we  
16 have *a priori* decided to only include interventions that the infants were subjected to in the  
17 immediate postnatal period irrespective of whether these interventions were physically carried out  
18 in the room where the infant was born. Studies that examined interventions that were carried out  
19 after the initial stabilization period will be excluded from the review.  
20  
21  
22  
23  
24  
25  
26  
27  
28  
29  
30  
31

## 32 **Outcomes**

33  
34 Our primary outcome is bronchopulmonary dysplasia (defined as oxygen requirement at  
35 36 weeks' postmenstrual age). Secondary outcomes include death at 36 weeks' postmenstrual age  
36 or before discharge; severe intraventricular hemorrhage (grade 3 or 4 based on the Papile  
37 criteria)(26); any air leak syndromes (including pneumothorax or pulmonary interstitial  
38 emphysema); retinopathy of prematurity (any stage) and neurodevelopmental impairment at 18-  
39 24 months. All the outcomes, its definitions and measures are detailed in the table 1.  
40  
41  
42  
43  
44  
45

## 46 **Patient and Public Involvement**

47  
48 Neither patients nor public were involved in the development of the research question or  
49 design of this study. This network meta-analysis does not recruit any patients. The study will be  
50 published and presented at conferences to healthcare professionals.  
51  
52  
53

## 54 **Study selection**

1  
2  
3 The titles and abstracts retrieved will be screened by two independent reviewers in  
4 duplicate to assess its eligibility using the Covidence platform (27). As a second step, the full text  
5 articles of the potentially eligible studies will be screened to assess their eligibility. We will include  
6 the full text of all studies for which both reviewers agree about their inclusion. For both steps, any  
7 disagreements between the reviewers will be resolved by discussion and if no agreement can be  
8 reached, a third member of the team will decide whether the study shall be included or not. We  
9 will refer to inclusion and exclusion criteria during the screening process. Records of ineligible  
10 full text articles along with the reason for ineligibility will be saved for future reference. Eligible  
11 articles citations will be uploaded to Covidence. We will present the PRISMA flow diagram(28)  
12 demonstrating the search and screening process.  
13  
14  
15  
16  
17  
18  
19  
20  
21

### 22 **Data Abstraction**

23  
24 A pre-specified standardized data extraction form in a Microsoft Excel sheet will be used  
25 to extract the data from the eligible studies. The data extraction form will be pilot tested  
26 independently by all reviewers before its use, to standardize the process. Eight reviewers will carry  
27 out the extraction, working independently in pairs and in duplicate. In case of disagreement in  
28 assessing the methodological quality of the study we will try to resolve it by consensus. If  
29 consensus cannot be reached a third designated reviewer will be involved. We will contact authors  
30 of primary studies, during data extraction, to provide any missing information.  
31  
32  
33  
34  
35  
36  
37

### 38 **Node Formation**

39  
40 Within each component of the stabilization pathway, we anticipate the identification  
41 numerous similar non-competing interventions (e.g. multiple synthetic and natural surfactants). In  
42 an iterative process, clinical experts (GS, SM, GP) blinded to the implications for effect estimates,  
43 will come to consensus on definitions of nodes and be presented with the implications of those  
44 decisions via network diagrams (e.g. lumping causing the loss of trials comparing lumped  
45 interventions, splitting causing disconnected networks). Experts will then be asked to identify  
46 whether groups of treatments should be defined as classes (e.g. natural vs synthetic surfactant) or  
47 lumped together. Class-based models have the advantage of offering an estimate of class effect as  
48 well as shrunken effects of individual treatments, while lumping can allow for more robust  
49 estimation of between-trial variability, and can reduce the probability of chance violations of NMA  
50  
51  
52  
53  
54  
55  
56  
57  
58  
59  
60

1  
2  
3 assumptions. This process will be repeated until a consensus decision is reached on the node  
4 making algorithm that meets the criteria of satisfying clinical demands, preserving the assumption  
5 that interventions within nodes are sufficiently similar, and presenting data in the least aggregated  
6 form possible(29).  
7  
8  
9

### 10 11 12 **Assessment of Risk of Bias**

13 The risk of bias (ROB) of eligible studies will be assessed according to a modified version  
14 of the Cochrane Collaboration's ROB tool(18). The six criteria to be assessed are sequence  
15 generation, allocation concealment, blinding of participants, personnel and outcome assessors,  
16 completeness of follow up, selective outcome reporting, and presence of other biases. Each domain  
17 will be assigned a score 'definitely low risk', or 'definitely high risk' or 'unclear risk'. Two  
18 independent reviewers will assess the ROB. We will try to reach consensus when disagreements  
19 between two reviewers when assessing the methodological quality of the studies. Nevertheless, if  
20 consensus cannot be reached, a third reviewer will resolve it.  
21  
22  
23  
24  
25  
26  
27  
28

### 29 **Measures of Treatment Effect**

30 Effect estimates along with 95% credible intervals (CrIs) will be estimated using risk ratios  
31 (RR) calculated using methods described by Dias, using the baseline risk parameter to convert  
32 odds ratios to risk ratios(29). When random effect models are used estimates will also be  
33 accompanied by their 95% predictive interval representing the interval within which we would  
34 expect the treatment effect of a future study to lie(30,31). Relative treatment rankings will be  
35 summarized using mean ranks with their 95% credible intervals and the Surface Under the  
36 Cumulative Ranking curve (SUCRA) values and cumulative probability rankograms(32).  
37 SUCRAs range from 0% to 100% with values of 100% representing a hypothetical treatment that  
38 is always best without uncertainty.  
39  
40  
41  
42  
43  
44  
45  
46  
47

### 48 **Assessment of reporting bias**

49 We will construct a comparison adjusted funnel plot for the network to assess the  
50 potential publication bias and small-study effects(33), if we retrieve at least 10 studies. We will  
51 inspect plots visually for evidence of asymmetry and if publication bias is suspected we will  
52 conduct a sensitivity analysis using models described by Mavridis, Welton and Salanti(34).  
53  
54  
55  
56  
57  
58  
59  
60

### Assessment of Transitivity Assumption

Clinical experts (GS, GP, SM) will assess trial characteristics using tables and visualizations to assess whether the transitivity assumption is likely to hold. The characteristics to be evaluated are those that are expected to be effect modifiers and will include gestational age, birth weight, baseline event risk, and ROB. These assessments will be made prior to any meta-analysis to limit to influence of presence or absence of statistical heterogeneity on the assessment of the transitivity assumption. The decision to pool data will be based on consensus. If it is determined that quantitative synthesis is inappropriate, we will summarize our findings narratively.

### Direct treatment comparisons

Given that we expect clinical and methodological heterogeneity among the studies (see below in Rating the Confidence in Estimates section), which in turn will create statistical heterogeneity, we will pool evidence for each treatment comparison using a Bayesian random-effects (RE) model(35). In comparison to the fixed-effect model (FE), the RE model is conservative in the sense that it accounts for both within- and between-study variability. The RE model assumes that the observed treatment effect for a study is a combination of a treatment effect common to all studies plus a component specific to that study alone(36,37). Models will be based on standard code modified to include minimally informative priors on baselines, treatment effects, and between trial heterogeneity (38). These priors generally provide more stable estimates, particularly in cases where data are sparse, will be developed using the approach described by Gabry *et al* (39,40).

### The Network Meta-Analysis

For each outcome, we will present the network diagram and a forest plot compared against the common comparator with the network estimates as well as league tables showing all pairwise comparisons. To capture the non-competing nature of interventions along the stabilization pathway and to directly fulfill the research objectives we will use component models as described by Welton *et al*(41). These models assume that interventions across domains of the stabilization pathway are additive on the linear predictor scale (e.g. additive on logit scale for dichotomous outcomes). In



1  
2  
3 the absence of direct evidence for a given comparison an indirect comparison will provide an  
4 estimate of the treatment effect. In the presence of direct evidence, the NMA will provide a  
5 combined estimate (i.e., direct and indirect evidence)(32). For instance, in a triangular network  
6 ABC composed by studies that directly compare A vs. B and A vs. C treatments, we can indirectly  
7 estimate the effect of B vs. C treatments. In case direct evidence of B vs. C treatment comparison  
8 is also available, then a combined estimate of direct and indirect evidence of B vs. C can be  
9 calculated using a NMA.

10  
11 We will fit a Bayesian hierarchical model with weakly informative priors adjusting for  
12 correlation of multi-arm trials, and assuming a common-within network heterogeneity variance.  
13 We will assess heterogeneity by estimating the magnitude of the between-study variance (42). If  
14 the posterior estimate of between-study variance shows signs of prior dominance (e.g. extreme  
15 values and long tails), we will conduct sensitivity analysis using the empirically estimated  
16 informative prior distribution described by Turner *et al*(43). Markov chains will be run for a  
17 sufficient number of iterations to reach convergence, which we will assess on the basis of the  
18 Brooks-Gelman-Rubin diagnostic, with values less than 1.05 considered acceptable if consistent  
19 with visual inspection of convergence and time series plots(44). All analyses will be performed in  
20 JAGS or similar software via the statistical program R(45,46).

### 31 32 33 34 **Assessment of Inconsistency**

35  
36 Inconsistency is the statistical manifestation of the violation of the transitivity assumption,  
37 which presents as a disagreement between direct and indirect estimates (loop inconsistency),  
38 and/or inconsistency between studies that inform the same treatment comparison, but include a  
39 different number of treatment arms (design inconsistency). To evaluate both design and loop  
40 inconsistency, we will apply the design-by-treatment interaction model with random inconsistency  
41 effects (47,48). These findings will be interpreted within the context of the estimate of between-  
42 trial variance as these concepts are closely related and difficult to separate. For example, large  
43 estimates of between-trial variance are indicative of heterogeneity within direct comparisons but  
44 may also be the result of inconsistency between direct and indirect evidence.  
45  
46  
47  
48  
49  
50

### 51 52 53 **Exploration of heterogeneity and inconsistency**



1  
2  
3 We will perform a network meta-regression using of potential effect modifiers to explore  
4 important heterogeneity and/or inconsistency. We propose, the following potential sources of  
5 heterogeneity, which could be possible effect modifiers: gestational age, birth weight and ROB.  
6 We hypothesize that lower gestational age, and low ROB will be related to less effectiveness of  
7 interventions. Overall risk of bias will be determined by taking the average of the three most  
8 important risk of bias items identified by expert consensus (sequence generation, allocation  
9 concealment, and blinding). Meta-regression models will assume a single shared coefficient for all  
10 non-baseline treatments(42). Interpretation of meta-regression models will be in keeping with  
11 suggestions from Dias et al., namely: (1) Inclusion of the coefficient leads to a decrease in the  
12 estimate of between-study variance; and (2) The 95% credible intervals of the estimated coefficient  
13 exclude the null (42).  
14  
15  
16  
17  
18  
19  
20  
21  
22  
23

### 24 **Sensitivity Analyses**

25 We plan to perform sensitivity analyses of different heterogeneity priors to assess the  
26 robustness of results(35,43,49). Further, findings from component models will be compared  
27 against a model without this assumption. In both cases, we will compare model fit using both  
28 absolute (residual deviance) and relative (DIC) measures as well as a qualitative assessment of  
29 whether the analysis leads to an important change in effect estimates.  
30  
31  
32  
33  
34  
35

### 36 **Rating the confidence in estimates of the effect**

37 We will assess the confidence in the estimates for each outcome using the GRADE  
38 approach (50). For this purpose, two authors will independently do the assessment. The  
39 confidence in the estimates will be based on four levels: high, moderate, low and very low. For  
40 the direct comparisons we will assess and rate each outcome based on the categories: ROB  
41 imprecision, inconsistency and publication bias(51-55). To assist with assessment of each  
42 domain, we will use threshold plots, which show the smallest change in study/contrast level  
43 estimates required to change the conclusions of the analysis.  
44  
45  
46  
47  
48  
49

50 We will assess and rate the confidence in all the indirect comparisons –if available-  
51 obtained from first order loops following the GRADE categories used for assessing the direct  
52 comparisons in addition to the transitivity assessment. Transitivity, also called similarity(56), is  
53 the assumption that an indirect comparison is a valid method to compare two treatments that have  
54  
55  
56  
57  
58  
59

1  
2  
3 not been compared in a head-to-head trial, because the studies are sufficiently similar in important  
4 clinical and methodological characteristics, or in other words, that they are similar in their  
5 distributions of effect modifiers(57,58). Then, we will rate the confidence in each NMA effect  
6 estimate using the higher rating when both direct and indirect evidence are present.  
7  
8  
9

10 We will assess and rate the confidence in estimates of effect from the direct comparisons  
11 in our pairwise meta-analyses described previously. To rate the confidence in the indirect  
12 comparisons, we will focus our assessments on first-order loops (FOLs), i.e., loops connected to  
13 the interventions of interest through only one other intervention. For instance, if for A, B and C  
14 interventions, there are direct comparisons of A vs. B (AB) and B vs. C (BC), we will be able to  
15 indirectly estimate the effects of A vs. C (AC). The AC indirect estimation will be a FOL. We will  
16 choose the FOLs with the lowest variances for rating the confidence as they contribute the most to  
17 the estimates of effect.  
18  
19  
20  
21  
22  
23

24 Within FOLs, the indirect comparison confidence will be the lowest of the confidence  
25 ratings we have assigned to the contributing direct comparisons. For example, if we find that AB  
26 has moderate confidence and BC has high confidence, we will judge the associated indirect  
27 comparison, AC, as moderate confidence. We may rate down confidence in the indirect  
28 comparisons further if we have a strong suspicion that the transitivity assumption has been  
29 violated.  
30  
31  
32  
33

34 Our overall judgment of confidence in the NMA estimate for any pairwise comparison will  
35 be the higher of the confidence rating amongst the contributing direct and indirect comparisons.  
36 However, we may rate down confidence in the network estimate if we find that the direct and  
37 indirect estimates have inconsistency. For this purpose, the GRADE approach recommends to  
38 assess the incoherence (or inconsistency as described in the 'The Network Meta-Analysis' section)  
39 criteria, which is defined as the differences between direct and indirect estimates of effect(59).  
40  
41  
42  
43  
44  
45

### 46 **Multi-criteria Acceptability Analysis**

47  
48 Network meta-analyses provide an estimate of effect estimates of competing interventions,  
49 but this alone is not sufficient to aid decision making. We will aim to supplement this review with  
50 a stochastic multi-criteria acceptability analysis using methods defined by Tervonen, and Van  
51 Valkenhoef(60). These methods use a partial value function to allow for a quantitative risk-benefit  
52 analysis across multiple outcomes, given an ordinal ranking of importance for decision making  
53  
54  
55  
56  
57  
58  
59  
60

1  
2  
3 (e.g. Mortality > BPD). Based on the best fitting NMA model, we will conduct stochastic  
4 multicriteria acceptability analyses (SMAA): One without preference criteria, and a second with  
5 preference criteria determined by expert consensus. Since SMAA is based on estimates constrained  
6 to the interval [0,1] we will calculate absolute risk of outcomes based on either a suitably designed  
7 observational trial or, if unavailable, a pooled control arm risk of included studies in the reference  
8 treatment(61). If treatments require the tradeoff of common (e.g. BPD) and very rare (e.g.  
9 mortality) events, we will use the 95% credible interval hull approach(62). The outputs of the  
10 SMAA will be a rankogram outlining the probability that a treatment is best, second best, etc., a  
11 vector of central weights, a confidence factor for the preference free model; and the rankogram for  
12 the ordered model. The vector of central weights provides a summary of the implied preferences  
13 required to hold an *a priori* preference for one treatment or another (i.e. the outcome preference  
14 implied by a clinician's current practice). The confidence factor is the probability that a treatment  
15 is best given these preferences, and is used as a measure of uncertainty.  
16  
17  
18  
19  
20  
21  
22  
23  
24  
25  
26

## 27 Discussion

28  
29 Interventions in the immediate postnatal period may have long-term clinical implications.  
30 This NMA will provide the relative effectiveness of commonly practiced delivery room  
31 interventions for preterm infants born <33 weeks of gestation in preventing BPD. To the best of  
32 our knowledge this will be the first review that will examine the relative effectiveness of each  
33 delivery room intervention individually and in combination with respect to important clinical  
34 outcomes using novel statistical techniques. Its results will be of interest for a broad range of  
35 audience: practice guideline developers, pediatricians, neonatologists, policy makers and  
36 researchers, as it could be used to provide clinical recommendations for the choice of sequence of  
37 delivery room interventions.  
38  
39  
40  
41  
42  
43

44 Our review will have several methodological strengths. First, we will implement a wide  
45 comprehensive search to include published randomized clinical trials in the most important  
46 databases, as well as unpublished work. Second, we will use the novel method for rating the  
47 confidence in the estimates recommended by the GRADE working group. Third, we will employ  
48 a novel SMAA model to determine the most effective sequence of delivery room interventions  
49 with respect to the most important clinical outcomes(60). On the other hand, we anticipate some  
50 methodological challenges while undertaking such a review. We anticipate some degree of clinical  
51  
52  
53  
54  
55  
56  
57  
58  
59  
60

1  
2  
3 heterogeneity while considering such a large number of competing and non-competing delivery  
4 room interventions. Based on the number of interventions identified following the systematic  
5 review, we may have to lump interventions into single nodes or split a node into multiple nodes to  
6 generate clinically meaningful results.  
7  
8  
9

10 We hope that this review will provide an evidence based guide to choosing the right  
11 sequence of early postnatal interventions that will be associated with the least likelihood of  
12 inducing lung injury and BPD in preterm infants.  
13  
14  
15  
16  
17  
18  
19  
20  
21  
22  
23  
24  
25  
26  
27  
28  
29  
30  
31  
32  
33  
34  
35  
36  
37  
38  
39  
40  
41  
42  
43  
44  
45  
46  
47  
48  
49  
50  
51  
52  
53  
54  
55  
56  
57  
58  
59  
60

1  
2  
3  
4  
5  
6  
7  
8  
9  
10  
11  
12  
13  
14  
15  
16  
17  
18  
19  
20  
21  
22  
23  
24  
25  
26  
27  
28  
29  
30  
31  
32  
33  
34  
35  
36  
37  
38  
39  
40  
41  
42  
43  
44  
45  
46  
47  
48  
49  
50  
51  
52  
53  
54  
55  
56  
57  
58  
59  
60

**Figure legend:**

**Figure 1: Physiological sequence of potential delivery room interventions**

For peer review only

**Table 1. A priori defined outcome measures**

| Outcome Measure                        | Definition                                                                                                                                                                                                                                             |
|----------------------------------------|--------------------------------------------------------------------------------------------------------------------------------------------------------------------------------------------------------------------------------------------------------|
| Bronchopulmonary dysplasia             | No. of neonates who require oxygen at 36 weeks' postmenstrual age (PMA)                                                                                                                                                                                |
| Mortality                              | Death before discharge                                                                                                                                                                                                                                 |
| Severe intraventricular hemorrhage     | No. of neonates with grades 3-4 based on the Papile criteria                                                                                                                                                                                           |
| Air leak syndromes                     | No. of neonates with pneumothorax or pulmonary interstitial emphysema confirmed by chest X ray                                                                                                                                                         |
| Retinopathy of prematurity (any stage) | No. of neonates with any stage of Retinopathy of prematurity as per the international classification of Retinopathy of prematurity                                                                                                                     |
| Neurodevelopmental impairment          | No. of infants with any degree of neurodevelopmental impairment as assessed by a standardized and validated assessment tool, a child developmental specialist or both, at any age reported (outcome data grouped at 12, 18 and 24 months if available) |

## References

1. Bancalari E, Abdenour GE, Feller R, Gannon J. Bronchopulmonary dysplasia: clinical presentation. *Journal of Pediatrics* 1979;95(5 Pt 2):819-23.
2. Shennan AT, Dunn MS, Ohlsson A, Lennox K, Hoskins EM. Abnormal pulmonary outcomes in premature infants: prediction from oxygen requirement in the neonatal period. *Pediatrics* 1988;82(4):527-32.
3. Stoll BJ, Hansen NI, Bell EF, Walsh MC, Carlo WA, Shankaran S, Laptook AR, Sánchez PJ, Van Meurs KP, Wyckoff M, Das A, Hale EC, Ball MB, Newman NS, Schibler K, Poindexter BB, Kennedy KA, Cotten CM, Watterberg KL, D'Angio CT, DeMauro SB, Truog WE, Devaskar U, Higgins RD; Eunice Kennedy Shriver National Institute of Child Health and Human Development Neonatal Research Network. Trends in Care Practices, Morbidity, and Mortality of Extremely Preterm Neonates, 1993-2012. *JAMA*. 2015;314(10):1039-51.
4. Doyle LW, Faber B, Callanan C, Freezer N, Ford GW, Davis NM. Bronchopulmonary dysplasia in very low birth weight subjects and lung function in late adolescence. *Pediatrics* 2006; 118: 108–113.
5. Fawke J, Lum S, Kirkby J, Hennessy E, Marlow N, Rowell V et al. Lung function and respiratory symptoms at 11 years in children born extremely preterm: the Epicure study. *Am J Respir Crit Care Med* 2010; 182: 237–245.
6. Short EJ, Klein NK, Lewis BA, Fulton S, Eisengart S, Kercksmar C, Baley J, Singer LT. Cognitive and academic consequences of bronchopulmonary dysplasia and very low birth weight: 8-year-old outcomes. *Pediatrics*. 2003;112(5):e359
7. Twilhaar ES, Wade RM, de Kieviet JF, van Goudoever JB, van Elburg RM, Oosterlaan J. Cognitive Outcomes of Children Born Extremely or Very Preterm since the 1990s and

- 1  
2  
3 Associated Risk Factors: A Meta-analysis and Meta-regression. *JAMA Pediatr.*  
4 2018;172(4):361-367  
5  
6  
7  
8 8. Hillman NH, Moss TJM, Kallapur SG, Bachurski C, Pillow JJ, Polglase GR et al. Brief, large  
9 tidal volume ventilation initiates lung injury and a systemic response in fetal sheep. *Am J*  
10 *Respir Crit Care Med* 2007; 176: 575–581.  
11  
12  
13  
14 9. Wallace MJ, Probyn ME, Zahra VA, Crossley K, Cole TJ, Davis PG et al. Early biomarkers  
15 and potential mediators of ventilation-induced lung injury in very preterm lambs. *Respir Res*  
16 2009; 10: 19.  
17  
18  
19  
20  
21 10. Obladen M. Factors influencing surfactant composition in the newborn infant. *Eur J Pediatr*  
22 1978; 128: 129–143.  
23  
24  
25  
26 11. Heldt GP, McIlroy MB. Distortion of chest wall and work of diaphragm in preterm infants. *J*  
27 *Appl Physiol* (1985) 1987; 62: 164–169.  
28  
29  
30  
31 12. Heldt GP, McIlroy MB. Dynamics of chest wall in preterm infants. *J Appl Physiol* (1985)  
32 1987; 62: 170–174.  
33  
34  
35 13. Foglia EE, Jensen EA, Kirpalani H. State of the Art Review: Delivery room interventions to  
36 prevent bronchopulmonary dysplasia in extremely preterm infants. *Journal of perinatology :*  
37 *official journal of the California Perinatal Association.* 2017;37(11):1171-1179.  
38  
39  
40  
41  
42 14. Rich WD, Leone T, Finer NN. Delivery room intervention: improving the outcome. *Clin*  
43 *Perinatol.* 2010;37(1):189-202  
44  
45  
46  
47 15. Fogarty M, Osborn DA, Askie LM, et al. Delayed vs early umbilical cord clamping for preterm  
48 infants: a systematic review and meta-analysis. *The American Journal of Obstetrics &*  
49 *Gynecology* 2018;218:1–18.  
50  
51  
52  
53  
54  
55  
56  
57  
58  
59  
60



16. Schmölzer GM, Kumar M, Pichler G, et al. Non-invasive versus invasive respiratory support in preterm infants at birth: systematic review and meta-analysis. *BMJ* 2013;347:f5980
17. Pichler G, Urlesberger B, Schwabegger B, et al. Cerebral Oxygen Saturation to Guide Oxygen Delivery in Preterm Neonates for the Immediate Transition after Birth: A 2-Center Randomized Controlled Pilot Feasibility Trial. *J Pediatr* 2016;170:73–4.
18. Collaboration TC. The Cochrane Handbook for Systematic Reviews of Interventions Version 5.1.0. Higgins JPT, and Green, S., editor 2011.
19. Jansen JP, Crawford B, Bergman G, Stam W. Bayesian Meta-Analysis of Multiple Treatment Comparisons: An Introduction to Mixed Treatment Comparisons. *Value in Health*. 2008;11(5):956-64.
20. Jonas DE, Wilkins TM, Bangdiwala S, Bann CM, Morgan LC, Thaler KJ, Amick HR, Gartlehner G. Findings of Bayesian Mixed Treatment Comparison Meta-Analyses: Comparison and Exploration Using Real-World Trial Data and Simulation [Internet]. Rockville (MD): Agency for Healthcare Research and Quality (US); 2013 Feb. Available from <http://www.ncbi.nlm.nih.gov/books/NBK126109/> Accessed November 10, 2018.
21. Vento M, Cheung P-Y, Aguar M, et al. The first golden minutes of the extremely-low-gestational-age neonate: a gentle approach. *Neonatology* 2009;95:286–98.
22. Peleg B, Globus O, Granot M, et al. “Golden Hour” quality improvement intervention and short-term outcome among preterm infants. *J Perinatol* 2018;31:289.
23. Shah V, Hodgson K, Seshia M, et al. Golden hour management practices for infants <32 weeks gestational age in Canada. *Paediatr Child Health* 2018;23:70–6.

- 1  
2  
3 24. Shamseer L, Moher D, Clarke M, Gherzi D, Liberati A, Petticrew M, Shekelle P, Stewart LA;  
4 PRISMA-P Group. Preferred reporting items for systematic review and meta-analysis  
5 protocols (PRISMA-P) 2015: elaboration and explanation. *BMJ*. 2015;350:g7647.  
6  
7  
8  
9  
10 25. Hutton B, Salanti G, Caldwell DM, Chaimani A, Schmid CH, Cameron C, et al. The PRISMA  
11 Extension Statement for Reporting of Systematic Reviews Incorporating Network Meta-  
12 analyses of Health Care Interventions: Checklist and Explanations. *Ann Intern Med*.  
13 2015;162(11):777-84.  
14  
15  
16  
17  
18 26. Papile L-A, Burstein J, Burstein R, et al. Incidence and evolution of subependymal and  
19 intraventricular hemorrhage: a study of infants with birth weights less than 1,500 gm. *J Pediatr*  
20 1978;92:529-34  
21  
22  
23  
24  
25 27. Covidence systematic review software, Veritas Health Innovation, Melbourne, Australia.  
26 Available at [www.covidence.org](http://www.covidence.org)  
27  
28  
29  
30 28. PRISMA. Preferred Reporting Items for Systematic Reviews and Meta-Analyses [online].  
31 [cited 2018 Accessed April 20]. Available from: [http://www.prisma-](http://www.prisma-statement.org/statement.htm)  
32 [statement.org/statement.htm](http://www.prisma-statement.org/statement.htm)  
33  
34  
35  
36  
37 29. Introduction to Evidence Synthesis. In: *Network Meta-Analysis for Decision Making*  
38 [Internet]. John Wiley & Sons, Ltd; 2018. p. 1-17. Available from:  
39 <https://onlinelibrary.wiley.com/doi/abs/10.1002/9781118951651.ch1>  
40  
41  
42  
43  
44 30. Riley RD, Higgins JP, Deeks JJ. Interpretation of random effects meta-analyses. *BMJ*.  
45 2011;342.  
46  
47  
48  
49 31. Higgins J, Thompson SG, Spiegelhalter DJ. A re-evaluation of random-effects meta-analysis.  
50 *Journal of the Royal Statistical Society: Series A (Statistics in Society)*. 2009;172(1):137-59.  
51  
52  
53  
54  
55  
56  
57  
58  
59  
60

- 1  
2  
3 32. Salanti G, Ades AE, Ioannidis JP. Graphical methods and numerical summaries for presenting  
4 results from multiple-treatment meta-analysis: an overview and tutorial. *Journal of clinical*  
5  
6 epidemiology. 2011;64(2):163-71.  
7  
8  
9  
10 33. Chaimani A, Higgins JPT, Mavridis D, Spyridonos P, Salanti G. Graphical Tools for Network  
11  
12 Meta-Analysis in STATA. *PLoS One*. 2013;8(10).  
13  
14  
15 34. Mavridis D, Welton NJ, Salanti G. A selection model for accounting for publication bias in a  
16  
17 full network meta-analysis. *Stat Med*. 2014;33:5399–412.  
18  
19  
20 35. Lambert PC, Sutton AJ, Burton PR, Abrams KR, Jones DR. How vague is vague? A simulation  
21  
22 study of the impact of the use of vague prior distributions in MCMC using WinBUGS.  
23  
24 *Statistics in medicine*. 2005;24(15):2401.  
25  
26  
27 36. Cornell JE, Mulrow CD, Localio R, Stack CB, Meibohm AR, Guallar E, et al. Random-Effects  
28  
29 Meta-analysis of Inconsistent Effects: A Time for Change. *Annals of Internal Medicine*.  
30  
31 2014;160(4):267-70.  
32  
33  
34 37. DerSimonian R, Laird N. Meta-analysis in clinical trials. *Controlled clinical trials*.  
35  
36 1986;7(3):177-88.  
37  
38  
39 38. Dias S, Sutton AJ, Ades AE, Welton NJ. Evidence Synthesis for Decision Making 2: A  
40  
41 Generalized Linear Modeling Framework for Pairwise and Network Meta-analysis of  
42  
43 Randomized Controlled Trials. *Med Decis Mak*. 2013;33:607.  
44  
45  
46 39. Gelman A, Carlin J, Stern H, Dunson D, Vehtari A, Rubin D. Chapter 2: Single Parameter  
47  
48 models. In: *Bayesian data analysis*. Third Edit. New York: CRC Press; 2015.  
49  
50  
51 40. Gabry J, Simpson D, Vehtari A, Betancourt M, Gelman A. Visualization in Bayesian  
52  
53 workflow. 2017;2. <http://arxiv.org/abs/1709.01449>.  
54  
55  
56  
57  
58  
59  
60

- 1  
2  
3  
4  
5  
6  
7  
8  
9  
10  
11  
12  
13  
14  
15  
16  
17  
18  
19  
20  
21  
22  
23  
24  
25  
26  
27  
28  
29  
30  
31  
32  
33  
34  
35  
36  
37  
38  
39  
40  
41  
42  
43  
44  
45  
46  
47  
48  
49  
50  
51  
52  
53  
54  
55  
56  
57  
58  
59  
60
41. Welton NJ, Caldwell DM, Adamopoulos E, Vedhara K. Mixed treatment comparison meta-analysis of complex interventions: Psychological interventions in coronary heart disease. *Am J Epidemiol*. 2009;169:1158–65.
  42. Dias S, Welton NJ, Sutton AJ, Ades AE. Evidence Synthesis for Decision Making 3: Subgroups, Meta-Regression, Bias, and Bias-Adjustment. *Med Decis Mak* [Internet]. 2013;33(5):597–606. Available from: <http://mdm.sagepub.com/content/33/5/597.full.pdf+html> Accessed November 10, 2018
  43. Turner RM, Davey J, Clarke MJ, Thompson SG, Higgins JP. Predicting the extent of heterogeneity in meta-analysis, using empirical data from the Cochrane Database of Systematic Reviews. *International journal of epidemiology*. 2012;41(3):818-27.
  44. Gelman A, Rubin DB. Inference from iterative simulation using multiple sequences. *Statistical science*. 1992:457-72.
  45. Plummer, M., 2016. JAGS: Just another Gibbs sampler. Available at <http://mcmc-jags.sourceforge.net/>. Accessed March, 14, 2017.
  46. R Core Team. R: A language and environment for statistical computing. 2018. <https://cran.r-project.org/>.
  47. Dias S, Welton NJ, Sutton AJ, Caldwell DM, Lu G, Ades a E. Evidence synthesis for decision making 4: inconsistency in networks of evidence based on randomized controlled trials. *Med Decis Making* [Internet]. 2013;33(5):641–56.
  48. Jackson D, Barrett JK, Rice S, White IR, Higgins JPT. A design-by-treatment interaction model for network meta-analysis with random inconsistency effects. *Stat Med*. 2014;33:3639–54.

- 1  
2  
3 49. Rhodes KM, Turner RM, Higgins JP. Predictive distributions were developed for the extent of  
4  
5 heterogeneity in meta-analyses of continuous outcome data. *J Clin Epidemiol*. 2015;68(1):52-  
6  
7 60.  
8  
9
- 10 50. Guyatt G, Oxman AD, Akl EA, Kunz R, Vist G, Brozek J, et al. GRADE guidelines: 1.  
11  
12 Introduction—GRADE evidence profiles and summary of findings tables. *Journal of clinical*  
13  
14 *epidemiology*. 2011;64(4):383-94.  
15  
16
- 17 51. Balshem H, Helfand M, Schünemann HJ, Oxman AD, Kunz R, Brozek J, et al. GRADE  
18  
19 guidelines: 3. Rating the quality of evidence. *Journal of clinical epidemiology*.  
20  
21 2011;64(4):401-6.  
22  
23
- 24 52. Guyatt GH, Oxman AD, Vist G, Kunz R, Brozek J, Alonso-Coello P, et al. GRADE guidelines:  
25  
26 4. Rating the quality of evidence—study limitations (risk of bias). *Journal of clinical*  
27  
28 *epidemiology*. 2011;64(4):407-15.  
29  
30
- 31 53. Guyatt GH, Oxman AD, Kunz R, Brozek J, Alonso-Coello P, Rind D, et al. GRADE guidelines  
32  
33 6. Rating the quality of evidence—imprecision. *Journal of clinical epidemiology*.  
34  
35 2011;64(12):1283-93.  
36  
37
- 38 54. Guyatt GH, Oxman AD, Kunz R, Woodcock J, Brozek J, Helfand M, et al. GRADE guidelines:  
39  
40 7. Rating the quality of evidence—inconsistency. *Journal of clinical epidemiology*.  
41  
42 2011;64(12):1294-302.  
43  
44
- 45 55. Guyatt GH, Oxman AD, Montori V, Vist G, Kunz R, Brozek J, et al. GRADE guidelines: 5.  
46  
47 Rating the quality of evidence—publication bias. *Journal of clinical epidemiology*.  
48  
49 2011;64(12):1277-82.  
50  
51
- 52 56. Donegan S, Williamson P, Gamble C, Tudur-Smith C. Indirect comparisons: a review of  
53  
54 reporting and methodological quality. *PLoS One*. 2010;5(11):e11054.  
55  
56  
57  
58  
59  
60

- 1  
2  
3 57. Baker SG, Kramer BS. The transitive fallacy for randomized trials: if A bests B and B bests C  
4 in separate trials, is A better than C? *BMC Med Res Methodol*. 2002;2:13.  
5  
6  
7  
8 58. Cipriani A, Higgins JP, Geddes JR, Salanti G. Conceptual and technical challenges in network  
9 meta-analysis. *Annals of internal medicine*. 2013;159(2):130-7.  
10  
11  
12 59. Puhan MA, Schunemann HJ, Murad MH, Li T, Brignardello-Petersen R, Singh JA, et al. A  
13 GRADE Working Group approach for rating the quality of treatment effect estimates from  
14 network meta-analysis. *BMJ*. 2014;349:g5630.  
15  
16  
17  
18  
19 60. Van Valkenhoef G, Tervonen T, Zhao J, De Brock B, Hillege HL, Postmus D. Multicriteria  
20 benefit-risk assessment using network meta-analysis. *J Clin Epidemiol*. 2012;65:394–403.  
21  
22  
23 61. Dias S, Welton NJ, Sutton AJ, Ades AE. Evidence synthesis for decision making 5: The  
24 baseline natural history model. *Med Decis Mak*. 2013;33(5):657–70.  
25  
26  
27  
28 62. Tervonen T. New directions in Stochastic Multicriteria Acceptability Analysis. 2007 Dec 1  
29 [cited 2018 Nov 11]; Available from: <http://www.utupub.fi/handle/10024/28151>  
30  
31  
32  
33  
34  
35  
36  
37  
38  
39  
40  
41  
42  
43  
44  
45  
46  
47  
48  
49  
50  
51  
52  
53  
54  
55  
56  
57  
58  
59  
60

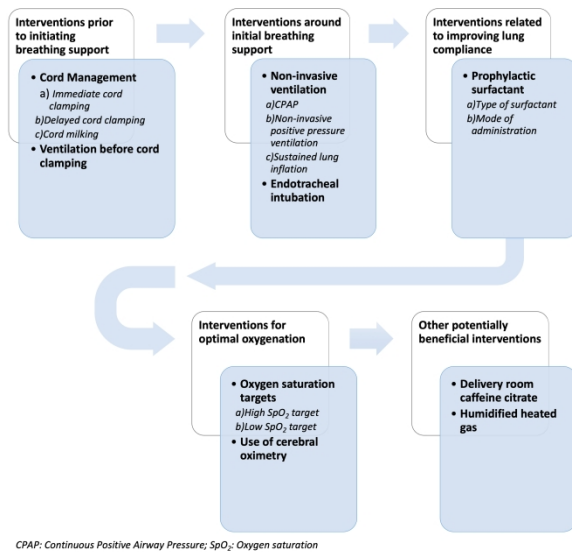

Figure 1: Physiological sequence of potential delivery room interventions

903x508mm (144 x 144 DPI)

## Appendix 1: Search strategy for EMBASE, Medline, and PubMed

### EMBASE

(newborn OR infant OR neonate OR preterm OR premature) AND [randomized controlled trial]/lim

AND

(continuous AND positive AND airway AND pressure OR cpap OR (nasal AND continuous AND positive AND airway AND pressure) OR ncpap OR (positive AND pressure AND ventilation) OR (intermittent AND positive AND pressure AND ventilation) OR (sustained AND lung AND inflation) OR (sustained AND inflation) OR si) AND [randomized controlled trial]/lim

OR

(supplemental AND oxygen OR (supplemental AND oxygen AND during AND resuscitation) OR oxygen OR surfactant OR (surfactant AND administration) OR (surfactant AND administration, AND early) OR (surfactant AND administration, AND late) OR (minimally AND invasive AND surfactant AND therapy) OR ('less invasive' AND surfactant AND administration)) AND [randomized controlled trial]/lim

OR

(lisa OR intubation OR (endotracheal AND intubation) OR (mechanical AND ventilation) OR caffeine OR (caffeine AND citrate) OR (respiratory AND function AND monitor) OR (delayed AND cord AND clamping) OR (cord AND milking)) AND [randomized controlled trial]/lim

AND

(randomized AND controlled AND trial OR 'randomized controlled trial':it OR (clinical AND trial)) AND [randomized controlled trial]/lim

AND

[randomized controlled trial]/lim AND [embase]/lim AND ([embryo]/lim OR [fetus]/lim OR [newborn]/lim OR [infant]/lim)

Limited to embryo from Age Groups fetus from Age Groups newborn from Age Groups infant from Age Groups



## Medline

| Set | Run Search | MEDLINE<br>Search History - " BPD"                                                                                                                                                                                                                                                                                                                                                                                                                                                                                                                                                                                                                                                                                                                                                                                                                              |
|-----|------------|-----------------------------------------------------------------------------------------------------------------------------------------------------------------------------------------------------------------------------------------------------------------------------------------------------------------------------------------------------------------------------------------------------------------------------------------------------------------------------------------------------------------------------------------------------------------------------------------------------------------------------------------------------------------------------------------------------------------------------------------------------------------------------------------------------------------------------------------------------------------|
| #5  |            | #3 AND #2 AND #1<br>Refined by: PUBLICATION TYPES: (RANDOMIZED CONTROLLED TRIAL)<br><i>DocType=All document types; Language=All languages;</i>                                                                                                                                                                                                                                                                                                                                                                                                                                                                                                                                                                                                                                                                                                                  |
| #4  |            | #3 AND #2 AND #1<br><i>DocType=All document types; Language=All languages;</i>                                                                                                                                                                                                                                                                                                                                                                                                                                                                                                                                                                                                                                                                                                                                                                                  |
| #3  |            | (MH=randomized controlled trial OR TS=randomized controlled trial OR TS=clinical trial) AND DOCUMENT TYPES: (Randomized Controlled Trial)<br><i>DocType=All document types; Language=All languages;</i>                                                                                                                                                                                                                                                                                                                                                                                                                                                                                                                                                                                                                                                         |
| #2  |            | TS=continuous positive airway pressure OR TS=CPAP OR TS=nasal continuous positive airway pressure OR TS=nCPAP OR TS=positive pressure ventilation OR TS=intermittent positive pressure ventilation OR TS=sustained lung inflation OR TS=sustained inflation OR TS=SI OR TS=supplemental oxygen OR TS=supplemental oxygen during resuscitation OR TS=oxygen OR TS=surfactant OR TS=surfactant administration OR TS=surfactant administration, early OR TS=surfactant administration, late OR TS=minimally invasive surfactant therapy OR TS=less-invasive surfactant administration OR TS=LISA OR TS=intubation OR TS=endotracheal intubation OR TS=mechanical ventilation OR TS=caffeine OR TS=caffeine citrate OR TS=respiratory function monitor OR TS=delayed cord clamping OR TS=cord milking<br><i>DocType=All document types; Language=All languages;</i> |
| #1  |            | TS=newborn OR TS=premature OR TS=infant OR TS=neonate OR TS=preterm<br><i>DocType=All document types; Language=All languages;</i>                                                                                                                                                                                                                                                                                                                                                                                                                                                                                                                                                                                                                                                                                                                               |

## PubMed

- #1 MeSH descriptor: [Infant] explode all trees
- #2 infant\*:ti,ab
- #3 neonat\*:ti,ab
- #4 newborn\*:ti,ab
- #5 preterm:ti,ab
- #6 premature:ti,ab
- #7 #1 or #2 or #3 or #4 or #5 or #6
- #8 "continuous positive airway pressure":ti,ab
- #9 "positive pressure ventilation":ti,ab
- #10 (sustained near/2 inflation):ti,ab
- #11 (supplemental near/2 oxygen):ti,ab
- #12 oxygen:ti,ab
- #13 surfactant:ti,ab
- #14 intubation:ti,ab
- #15 (mechanical\* near/1 ventilat\*):ti,ab
- #16 caffeine:ti,ab
- #17 "respiratory function monitor":ti,ab
- #18 (cord near/2 ((clamping and delayed) or milking)):ti,ab
- #19 #8 or #9 or #10 or #11 or #12 or #13 or #14 or #15 or #16 or #17 or #18

1  
2  
3 #20 #7 and #19  
4  
5  
6  
7  
8  
9  
10  
11  
12  
13  
14  
15  
16  
17  
18  
19  
20  
21  
22  
23  
24  
25  
26  
27  
28  
29  
30  
31  
32  
33  
34  
35  
36  
37  
38  
39  
40  
41  
42  
43  
44  
45  
46  
47  
48  
49  
50  
51  
52  
53  
54  
55  
56  
57  
58  
59  
60

For peer review only

# BMJ Open

## Delivery Room Interventions to Prevent Bronchopulmonary Dysplasia in Preterm Infants: A Protocol for a Systematic Review and Network Meta-Analysis

|                                 |                                                                                                                                                                                                                                                                                                                                                                                                                                                                                                                                                                                                                                                                                                                                                                                                          |
|---------------------------------|----------------------------------------------------------------------------------------------------------------------------------------------------------------------------------------------------------------------------------------------------------------------------------------------------------------------------------------------------------------------------------------------------------------------------------------------------------------------------------------------------------------------------------------------------------------------------------------------------------------------------------------------------------------------------------------------------------------------------------------------------------------------------------------------------------|
| Journal:                        | <i>BMJ Open</i>                                                                                                                                                                                                                                                                                                                                                                                                                                                                                                                                                                                                                                                                                                                                                                                          |
| Manuscript ID                   | bmjopen-2018-028066.R1                                                                                                                                                                                                                                                                                                                                                                                                                                                                                                                                                                                                                                                                                                                                                                                   |
| Article Type:                   | Protocol                                                                                                                                                                                                                                                                                                                                                                                                                                                                                                                                                                                                                                                                                                                                                                                                 |
| Date Submitted by the Author:   | 22-Mar-2019                                                                                                                                                                                                                                                                                                                                                                                                                                                                                                                                                                                                                                                                                                                                                                                              |
| Complete List of Authors:       | Mitra, Souvik; Dalhousie University, IWK Health Center, Department of Pediatrics<br>Disher, Timothy; School of Nursing, Dalhousie University<br>Pichler, Gerhard; Medical University of Graz, Research Unit for Neonatal Micro- and Macrocirculation, Department of Pediatrics<br>D'Souza, Brandon; IWK Health Centre, Department of Respiratory Therapy<br>Mccord, Helen; Dalhousie University, IWK Health Center, Department of Pediatrics<br>Chayapathi, Varsha; Dalhousie University, IWK Health Center, Department of Pediatrics<br>Jones, Karlee; Dalhousie University, IWK Health Center, Department of Pediatrics<br>Schmölzer, Georg; Royal Alexandra Hospital, Centre for the Studies of Asphyxia and Resuscitation, Neonatal Research Unit, ; University of Alberta, Department of Pediatrics |
| <b>Primary Subject Heading</b>: | Paediatrics                                                                                                                                                                                                                                                                                                                                                                                                                                                                                                                                                                                                                                                                                                                                                                                              |
| Secondary Subject Heading:      | Research methods                                                                                                                                                                                                                                                                                                                                                                                                                                                                                                                                                                                                                                                                                                                                                                                         |
| Keywords:                       | Infants, Bronchopulmonary dysplasia, Delivery Room, Newborn                                                                                                                                                                                                                                                                                                                                                                                                                                                                                                                                                                                                                                                                                                                                              |
|                                 |                                                                                                                                                                                                                                                                                                                                                                                                                                                                                                                                                                                                                                                                                                                                                                                                          |

SCHOLARONE™  
Manuscripts

1  
2  
3 **Delivery Room Interventions to Prevent Bronchopulmonary Dysplasia in Preterm**  
4  
5 **Infants: A Protocol for a Systematic Review and Network Meta-Analysis**  
6

7  
8 Souvik Mitra MD MSc<sup>1</sup>, Timothy Disher PhD(c), RN<sup>2</sup>, Gerhard Pichler MD<sup>3</sup>, Brandon D'Souza  
9  
10 BHSc, RRT<sup>6</sup>, Helen Mccord MN<sup>1</sup>, Varsha Chayapathi MBBS, DNB<sup>1</sup>, Karlee Jones BScPharm,  
11  
12 ACPR<sup>1</sup>, Georg M. Schmölder MD, PhD<sup>4,5</sup>  
13

14  
15 <sup>1</sup>Department of Pediatrics, Dalhousie University, IWK Health Center, Halifax, Canada

16  
17 <sup>2</sup>School of Nursing, Dalhousie University, Halifax Nova Scotia, Canada

18  
19 <sup>3</sup>Research Unit for Neonatal Micro- and Macrocirculation, Department of Pediatrics, Medical  
20  
21 University of Graz, Austria  
22

23  
24 <sup>4</sup>Centre for the Studies of Asphyxia and Resuscitation, Neonatal Research Unit, Royal Alexandra  
25  
26 Hospital, Edmonton, Alberta, Canada  
27

28  
29 <sup>5</sup>Department of Pediatrics, University of Alberta, Edmonton, Alberta, Canada

30  
31 <sup>6</sup>Department of Respiratory Therapy, IWK Health Centre, Halifax, Nova Scotia, Canada  
32

33  
34  
35 **Corresponding author:**  
36

37  
38 Georg M. Schmölder, MD, PhD

39  
40 Centre for the Studies of Asphyxia and Resuscitation,

41  
42 Neonatal Research Unit, Royal Alexandra Hospital,

43  
44 10240 Kingsway Avenue NW,

45  
46 T5H 3V9, Edmonton, Alberta, Canada

47  
48 Telephone +1 780 735 4660

49  
50  
51 Fax: +1 780 735 4072

52  
53  
54 Email: [georg.schmoelzer@me.com](mailto:georg.schmoelzer@me.com)  
55

**Conflict of Interest:**

SM, GP, VC, have declared no conflict of interest. TD provides methodological advice for Cornerstone Research Group Inc. Cornerstone Research Group Inc. consults for various pharmaceutical and medical device companies. BD has provided device training and educational presentations to clinicians on behalf of Mallinckrodt Pharmaceuticals. GMS has registered the RETAIN neonatal resuscitation board (Tech ID 2017083) and RETAIN neonatal resuscitation video game (Tech ID 2017086) under Canadian copyright, and GMS is the owner of RETAIN Labs Inc. (<https://www.playretain.com>), which is distributing these games.

**Keywords:** INFANTS, NEWBORN, DELIVERY ROOM, BRONCHOPULMONARY DYSPLASIA

**Funding sources**

We would like to thank the public for donating money to our funding agencies: GMS is a recipient of the Heart and Stroke Foundation/University of Alberta Professorship of Neonatal Resuscitation, a National New Investigator of the Heart and Stroke Foundation Canada and an Alberta New Investigator of the Heart and Stroke Foundation Alberta. This research has been facilitated by the Women and Children's Health Research Institute through the generous support of the Stollery Children's Hospital Foundation.

**Abstract: 250 words**

**Manuscript: 3,963 words**

**Tables: 1**

**Figures: 1****Author's contribution:**

Conception and design: GMS, SM

Data analysis plan: GMS, SM, GP, TD, BDS, HM, VC, KJ

Drafting of the article: GMS, SM, GP, TD, BDS, HM, VC, KJ

Critical revision of the article for important intellectual content: GMS, SM, GP, TD, BDS, HM, VC, KJ

Final approval of the article: GMS, SM, GP, TD, BDS, HM, VC, KJ

The Corresponding Author has the right to grant on behalf of all authors and does grant on behalf of all authors, an exclusive licence (or non-exclusive for government employees) on a worldwide basis to the BMJ Publishing Group Ltd and its Licensees to permit this article (if accepted) to be published in BMJ Open and any other BMJ PGL products to exploit all subsidiary rights, as set out in our licence <http://authors.bmj.com/submitting-your-paper/copyright-and-authors-rights/> and the Corresponding Author accepts and understands that any supply made under these terms is made by BMJ PGL to the Corresponding Author. Where the Corresponding Author wishes to make the article available on an open access basis (and intends to pay the relevant open access fee), the terms of such open access shall be governed by a [Creative Commons](#) licence – details of these licences and which Creative Commons licence will apply to this article are set out in our licence referred to above.

**Abbreviations:**

|           |                                                                                 |
|-----------|---------------------------------------------------------------------------------|
| BPD       | - Bronchopulmonary dysplasia                                                    |
| ELGAN     | - Extremely low gestational age newborns                                        |
| IQ        | - Intelligence quotient                                                         |
| CPAP      | - Continuous positive airway pressure                                           |
| NMA       | - Network meta-analysis                                                         |
| RE        | - Random-effects model                                                          |
| RCT       | - Randomized controlled trials                                                  |
| INSURE    | - Intubate-Surfactant-Extubate technique                                        |
| LISA/MIST | - Less-invasive surfactant administration/minimally invasive surfactant therapy |
| ROB       | - Risk of bias                                                                  |
| CrIs      | - Credible intervals                                                            |
| RR        | - Risk ratio                                                                    |
| SUCRA     | - Surface Under the Cumulative Ranking curve                                    |
| FE        | - Fixed-effect model                                                            |
| FOL       | - First-order loops                                                             |
| SMAA      | - Stochastic multicriteria acceptability analysis                               |

## Abstract

### Introduction

As gestational age decreases, incidence of bronchopulmonary dysplasia (BPD) and chronic lung disease increases. There are many interventions used in the delivery room to prevent acute lung injury and consequently BPD in these patients. The availability of different treatment options often poses a practical challenge to the practicing neonatologist when it comes to making an evidence based choice as the multitude of pairwise systematic reviews including Cochrane reviews that are currently available only provide a narrow perspective through head-to-head comparisons.

### Methods and Analysis

We will conduct a systematic review of all randomized controlled trials evaluating delivery room interventions within the 1st golden hour after birth for prevention of BPD. The primary outcome BPD. Secondary outcomes include death at 36 weeks' postmenstrual age or before discharge; severe intraventricular hemorrhage (grade 3 or 4 based on the Papile criteria); any air leak syndromes (including pneumothorax or pulmonary interstitial emphysema); retinopathy of prematurity (any stage) and neurodevelopmental impairment at 18-24 months. We will search Medline, EMBASE, and Cochrane Central Register of Controlled Trials (CENTRAL) as well as grey literature resources. Two reviewers will independently screen titles and abstracts, review full texts, extract information, and assess the risk of bias (ROB) and the confidence in the estimate (with Grading of Recommendations Assessment, Development and Evaluation (GRADE) approach). This review will use Bayesian network meta-analysis approach which allows the comparison of the multiple delivery room interventions for prevention of BPD. We will perform a Bayesian network meta-analysis to combine the pooled direct and indirect treatment effect estimates for each outcome, effectiveness, and safety of delivery room interventions for prevention of BPD.

### Ethics and Dissemination

The proposed protocol is a network meta-analysis, which has been registered on PROSPERO International prospective register of systematic reviews (CRD42018078648). The results will provide an evidence based guide to choosing the right sequence of early postnatal interventions that will be associated with the least likelihood of inducing lung injury and BPD in preterm infants. Furthermore, we will identify knowledge gaps and will encourage further research for other



1  
2  
3 therapeutic options. Therefore, its results will be disseminated through peer-reviewed publications  
4 and conference presentations. Due to the nature of the design, no ethics approval is necessary.

### 5 6 **Strengths and limitations of this study**

#### 7 8 **Strengths:**

- 9
- 10 • Comprehensive search to include published randomized clinical trials in the most important  
11 databases, as well as unpublished work
  - 12 • Use the novel method for rating the confidence in the estimates recommended by the  
13 GRADE working group
  - 14 • We will employ a novel Stochastic multicriteria acceptability analysis model to determine  
15 the most effective sequence of delivery room interventions with respect to the most  
16 important clinical outcomes

#### 17 18 **Limitations:**

- 19
- 20 • We anticipate some degree of clinical heterogeneity while considering such a large number  
21 of competing and non-competing delivery room interventions
  - 22 • Potential to lump interventions into single nodes or split a node into multiple nodes to  
23 generate clinically meaningful results
- 24  
25  
26  
27  
28  
29  
30  
31  
32  
33  
34  
35  
36  
37  
38  
39  
40  
41  
42  
43  
44  
45  
46  
47  
48  
49  
50  
51  
52  
53  
54  
55  
56  
57  
58  
59  
60

## Introduction

Bronchopulmonary dysplasia (BPD) is the most common chronic respiratory morbidity associated with premature birth. BPD is defined as either need of supplemental oxygen at i) 28 days postnatal age(1), or ii) 36 weeks' postmenstrual age with or without compatible clinical and radiographic findings(2). BPD affects 30-60% of prematurely born infants with the incidence being inversely proportional to gestational age(3). With increased survival of extremely low gestational age newborns (ELGAN), the incidence of BPD continues to increase despite improvement in neonatal care practices over the last two decades(3). BPD is known to be associated with long-term respiratory morbidity that persists into adolescence and adulthood(4,5). There is also increasing evidence that BPD and duration on supplemental oxygen have long-term adverse effects on cognitive and academic achievement with each percent increase in BPD rate being associated with a 0.01 standard deviation decrease in intelligence quotient (IQ) (0.15 IQ points) ( $p < 0.001$ )(6,7).

Several antenatal, perinatal, and postnatal factors contribute to the development of BPD. It is postulated that early lung injury and inflammation play an important role in the pathogenesis of BPD (8,9). In the fetus, the gas exchange organ is the placenta and the function of gas exchange is transferred from the placenta to the lungs immediately after birth. Therefore, the newborn infant's lungs must open and be aerated to allow the transition from fetal to postnatal circulation and physiology. However, in ELGANs, several physiological factors prevent this transition. These include lack of surfactant leading to increased alveolar surface tension, non-compliant chest wall, and weak respiratory muscles(10-12). Therefore, most ELGANs require assisted ventilation and/or supplemental oxygen after birth to ensure optimal gas exchange. However, both therapies may also induce lung inflammation due to barotrauma and/or volutrauma and oxygen-free radical generation thereby initiating the pathogenesis of BPD. Therefore, any interventions targeted at limiting lung injury and oxidative stress during resuscitation in the delivery room immediately after the birth may help to prevent the development of BPD or reduce its severity.

A number of clinical trials have been conducted on a variety of delivery room interventions, including i) interventions prior to initiating breathing support (i.e., clamping vs. milking the umbilical cord); ii) interventions around initial breathing support (i.e., continuous positive airway pressure (CPAP), non-invasive positive pressure ventilation, sustained lung inflation or endotracheal intubation); iii) interventions related to improving lung compliance (i.e., prophylactic

1  
2  
3 surfactant therapy including the different variations in its administration modalities); iv)  
4 interventions related to minimizing oxidative stress (i.e., higher vs. lower oxygen saturation  
5 targets), v) use of cerebral oximetry, and vi) other potentially beneficial therapies such as caffeine  
6 administration (Figure 1)(13,14).  
7  
8  
9

10 The availability of multiple potential interventions in a resuscitation scenario often poses  
11 a practical challenge to health care professionals as to which sequence of interventions would  
12 provide the greatest likelihood of minimizing BPD and which interventions are unnecessary and  
13 unlikely to be of any benefit(13). There have been previous systematic reviews and pairwise meta-  
14 analyses on the different competing interventions such as initial breathing support and oxygen  
15 saturation targets(15-17). However, these meta-analyses, though well conducted, provide a narrow  
16 perspective to the situation where a sequence of non-competing interventions occur within a short  
17 time-frame whereas each intervention has potentially competing variations. Use of a network  
18 meta-analysis (NMA) framework may help to provide a more feasible, comprehensive and  
19 evidence-based solution to the dilemma that health care professionals face during resuscitation of  
20 ELGANs with regards to multiple competing interventions aimed at mitigating lung injury. The  
21 Cochrane handbook considers NMA as a highly valuable tool to evaluate and rank treatment  
22 options according to their safety and effectiveness(18). Bayesian NMA have been proposed as an  
23 effective method for evaluating the effectiveness of multiple competing interventions(18-20).  
24 Delivery room interventions consist of a sequence of non-competing category of interventions and  
25 within each category there are several potentially competing interventions (Figure 1). Given that  
26 many of these competing delivery room interventions have not been compared in head-to-head  
27 studies, we expect that some of the possible comparisons between the interventions will not have  
28 direct evidence. Hence, we will perform a random effects network meta-analysis (NMA). Delivery  
29 room interventions will be defined as all potential interventions in the immediate postnatal  
30 period(21-23).  
31  
32  
33  
34  
35  
36  
37  
38  
39  
40  
41  
42  
43  
44  
45  
46  
47

## 48 **OBJECTIVES**

49 To determine the relative effectiveness of commonly practiced delivery room interventions  
50 for preterm infants born <33 weeks of gestation in preventing BPD using a Bayesian network  
51 meta-analysis.  
52  
53  
54  
55  
56  
57  
58  
59  
60

## METHODS & DESIGN

This systematic review and NMA protocol has been registered on PROSPERO International prospective register of systematic reviews (CRD42018078648). This protocol was developed following the Preferred reporting items for systematic review and meta-analysis protocols (PRISMA-P) guidance(24). The final report will comply with the recommendations of the PRISMA Extension Statement for Reporting of Systematic Reviews Incorporating Network Meta-analyses of Health Care Interventions(25).

### Search Strategy

We will search from their inception to August 2018, the following databases: MEDLINE, EMBASE and the Cochrane Central Register of Controlled Trials (CENTRAL). We will use combination of controlled terms (Medical Subject Heading, MeSH, and Emtree), and free-text terms with various synonyms for the different possible delivery room interventions and BPD. Search alerts will be set up for monthly notification and the search will be repeated before the final manuscript submission to identify any new relevant trials. Search strategies have been developed with liaison with an experienced librarian. No language, publication status or date limit will be used. The search strategies have been detailed in appendix A.

We will seek registered details of selected trials in the U.S. National Institutes of Health resource ([www.clinicaltrials.gov](http://www.clinicaltrials.gov)) and the WHO International Clinical Trials Registry Platform Search Portal. We intend to obtain additional grey literature from personal communication from experts in the field, reviewing the reference lists of relevant articles, abstracts and conference proceedings (Society for Pediatric Research, European Society for Pediatric Research) and seeking results of unpublished trials. We intend to contact authors of unpublished work and authors of published trials in order to clarify information that is not clear in the articles.

### Eligibility Criteria

We will include randomized controlled trials (RCTs) that evaluate the effectiveness of commonly practiced delivery room interventions. Studies will have to have the following characteristics regarding participants, intervention, control and type of study.

- a) Participants: Preterm infants (<33 weeks) requiring intervention(s) during neonatal transition within the 1<sup>st</sup> golden hour after birth

- 1  
2  
3 b) Interventions include the following: i) cord management (including immediate cord clamping,  
4 delayed cord clamping, cord milking, and/or resuscitation attached to the cord); ii) respiratory  
5 support (including positive pressure ventilation, CPAP, sustained lung inflation, and/or  
6 intubation, and mechanical ventilation); iii) surfactant delivery (type of surfactant delivered  
7 via endotracheal tube or laryngeal mask, INSURE (Intubate-Surfactant-Extubate) technique,  
8 LISA/MIST (less-invasive surfactant administration/minimally invasive surfactant therapy),  
9 and/or nebulized surfactant administration; iv) initial fractional concentration of inspired  
10 oxygen ( $FiO_2$ ) ( $\leq 0.3$  or  $\geq 0.6$ ); v) monitoring during resuscitation (respiratory function monitor,  
11 near-infrared spectroscopy); vi) medication (e.g., caffeine citrate, or diuretics); vii) use of  
12 heated, humidified gas  
13  
14 c) Comparator: One or more of the above interventions compared to each other or no treatment.  
15 Since interventions possible in a delivery room are largely related to delivery room resources, we  
16 have *a priori* decided to only include interventions that the infants were subjected to in the  
17 immediate postnatal period irrespective of whether these interventions were physically carried out  
18 in the room where the infant was born. Studies that examined interventions that were carried out  
19 after the initial stabilization period will be excluded from the review.  
20  
21  
22  
23  
24  
25  
26  
27  
28  
29  
30  
31

## 32 Outcomes

33  
34 Our primary outcome is bronchopulmonary dysplasia (defined as oxygen requirement at  
35 36 weeks' postmenstrual age). Secondary outcomes include death at 36 weeks' postmenstrual age  
36 or before discharge; severe intraventricular hemorrhage (grade 3 or 4 based on the Papile  
37 criteria)(26); any air leak syndromes (including pneumothorax or pulmonary interstitial  
38 emphysema); retinopathy of prematurity (any stage) and neurodevelopmental impairment at 18-  
39 24 months. All the outcomes, its definitions and measures are detailed in the table 1. We aim to  
40 perform one subgroup analysis comparing infants <28 weeks versus 29-32 weeks.  
41  
42  
43  
44  
45  
46  
47

## 48 Patient and Public Involvement

49  
50 Neither patients nor public were involved in the development of the research question or  
51 design of this study. This network meta-analysis does not recruit any patients. The study will be  
52 published and presented at conferences to healthcare professionals.  
53  
54  
55  
56  
57  
58  
59  
60

### Study selection

The titles and abstracts retrieved will be screened by two independent reviewers in duplicate to assess its eligibility using the Covidence platform (27). As a second step, the full text articles of the potentially eligible studies will be screened to assess their eligibility. We will include the full text of all studies for which both reviewers agree about their inclusion. For both steps, any disagreements between the reviewers will be resolved by discussion and if no agreement can be reached, a third member of the team will decide whether the study shall be included or not. We will refer to inclusion and exclusion criteria during the screening process. Records of ineligible full text articles along with the reason for ineligibility will be saved for future reference. Eligible articles citations will be uploaded to Covidence. We will present the PRISMA flow diagram(28) demonstrating the search and screening process.

### Data Abstraction

A pre-specified standardized data extraction form in a Microsoft Excel sheet will be used to extract the data from the eligible studies. The data extraction form will be pilot tested independently by all reviewers before its use, to standardize the process. Eight reviewers will carry out the extraction, working independently in pairs and in duplicate. In case of disagreement in assessing the methodological quality of the study we will try to resolve it by consensus. If consensus cannot be reached a third designated reviewer will be involved. We will contact authors of primary studies, during data extraction, to provide any missing information.

### Node Formation

Within each component of the stabilization pathway, we anticipate the identification numerous similar non-competing interventions (e.g. multiple synthetic and natural surfactants). In an iterative process, clinical experts (GS, SM, GP) blinded to the implications for effect estimates, will come to consensus on definitions of nodes and be presented with the implications of those decisions via network diagrams (e.g. lumping causing the loss of trials comparing lumped interventions, splitting causing disconnected networks). Experts will then be asked to identify whether groups of treatments should be defined as classes (e.g. natural vs synthetic surfactant) or lumped together. Class-based models have the advantage of offering an estimate of class effect as well as shrunken effects of individual treatments, while lumping can allow for more robust

1  
2  
3 estimation of between-trial variability, and can reduce the probability of chance violations of NMA  
4 assumptions. This process will be repeated until a consensus decision is reached on the node  
5 making algorithm that meets the criteria of satisfying clinical demands, preserving the assumption  
6 that interventions within nodes are sufficiently similar, and presenting data in the least aggregated  
7 form possible(29).  
8  
9  
10  
11  
12

### 13 **Assessment of Risk of Bias**

14  
15 The risk of bias (ROB) of eligible studies will be assessed according to a modified version  
16 of the Cochrane Collaboration's ROB tool(18). The six criteria to be assessed are sequence  
17 generation, allocation concealment, blinding of participants, personnel and outcome assessors,  
18 completeness of follow up, selective outcome reporting, and presence of other biases. Each domain  
19 will be assigned a score 'definitely low risk', or 'definitely high risk' or 'unclear risk'. Two  
20 independent reviewers will assess the ROB. We will try to reach consensus when disagreements  
21 between two reviewers when assessing the methodological quality of the studies. Nevertheless, if  
22 consensus cannot be reached, a third reviewer will resolve it.  
23  
24  
25  
26  
27  
28  
29

### 30 **Measures of Treatment Effect**

31  
32 Effect estimates along with 95% credible intervals (CrIs) will be estimated using risk ratios  
33 (RR) calculated using methods described by Dias, using the baseline risk parameter to convert  
34 odds ratios to risk ratios(29). When random effect models are used estimates will also be  
35 accompanied by their 95% predictive interval representing the interval within which we would  
36 expect the treatment effect of a future study to lie(30,31). Relative treatment rankings will be  
37 summarized using mean ranks with their 95% credible intervals and the Surface Under the  
38 Cumulative Ranking curve (SUCRA) values and cumulative probability rankograms(32).  
39 SUCRAs range from 0% to 100% with values of 100% representing a hypothetical treatment that  
40 is always best without uncertainty.  
41  
42  
43  
44  
45  
46  
47  
48  
49

### 50 **Assessment of reporting bias**

51 We will construct a comparison adjusted funnel plot for the network to assess the  
52 potential publication bias and small-study effects(33), if we retrieve at least 10 studies. We will  
53  
54  
55  
56  
57  
58  
59



1  
2  
3 inspect plots visually for evidence of asymmetry and if publication bias is suspected we will  
4 conduct a sensitivity analysis using models described by Mavridis, Welton and Salanti(34).  
5  
6  
7

### 8 **Assessment of Transitivity Assumption**

9  
10 Clinical experts (GS, GP, SM) will assess trial characteristics using tables and  
11 visualizations to assess whether the transitivity assumption is likely to hold. The characteristics  
12 to be evaluated are those that are expected to be effect modifiers and will include gestational age,  
13 birth weight, baseline event risk, and ROB. These assessments will be made prior to any meta-  
14 analysis to limit to influence of presence or absence of statistical heterogeneity on the assessment  
15 of the transitivity assumption. The decision to pool data will be based on consensus. If it is  
16 determined that quantitative synthesis is inappropriate, we will summarize our findings  
17 narratively.  
18  
19  
20  
21  
22  
23  
24  
25

### 26 **Direct treatment comparisons**

27 Given that we expect clinical and methodological heterogeneity among the studies (see  
28 below in Rating the Confidence in Estimates section), which in turn will create statistical  
29 heterogeneity, we will pool evidence for each treatment comparison using a Bayesian random-  
30 effects (RE) model(35). In comparison to the fixed-effect model (FE), the RE model is  
31 conservative in the sense that it accounts for both within- and between-study variability. The RE  
32 model assumes that the observed treatment effect for a study is a combination of a treatment effect  
33 common to all studies plus a component specific to that study alone(36,37). Models will be based  
34 on standard code modified to include minimally informative priors on baselines, treatment effects,  
35 and between trial heterogeneity (38). These priors generally provide more stable estimates,  
36 particularly in cases where data are sparse, will be developed using the approach described by  
37 Gabry *et al* (39,40).  
38  
39  
40  
41  
42  
43  
44  
45  
46  
47

### 48 **The Network Meta-Analysis**

49 For each outcome, we will present the network diagram and a forest plot compared against  
50 the common comparator with the network estimates as well as league tables showing all pairwise  
51 comparisons. To capture the non-competing nature of interventions along the stabilization pathway  
52 and to directly fulfill the research objectives we will use component models as described by Welton  
53  
54  
55  
56  
57  
58  
59  
60



1  
2  
3 *et al*(41). These models assume that interventions across domains of the stabilization pathway are  
4 additive on additive on logit scale for dichotomous outcomes (e.g. mortality). In the absence of  
5 direct evidence for a given comparison an indirect comparison will provide an estimate of the  
6 treatment effect. In the presence of direct evidence, the NMA will provide a combined estimate  
7 (i.e., direct and indirect evidence)(32). For instance, in a triangular network ABC composed by  
8 studies that directly compare A vs. B and A vs. C treatments, we can indirectly estimate the effect  
9 of B vs. C treatments. In case direct evidence of B vs. C treatment comparison is also available,  
10 then a combined estimate of direct and indirect evidence of B vs. C can be calculated using a  
11 NMA.  
12  
13  
14  
15  
16  
17  
18

19 We will fit a Bayesian hierarchical model with weakly informative priors (i.e. normal with  
20 mean zero and standard deviation 5 for outcomes on the logit scale) adjusting for correlation of  
21 multi-arm trials, and assuming a common-within network heterogeneity variance (uniform on 0-  
22 2). We will assess heterogeneity by estimating the magnitude of the between-study variance (42).  
23 If the posterior estimate of between-study variance shows signs of prior dominance (e.g. extreme  
24 values and long tails, odds ratios approaching infinity), we will assess whether using the  
25 empirically estimated informative prior distribution described by Turner *et al*(43) provides more  
26 sensible estimates. If the network structure is such that estimates of credible intervals are  
27 sufficiently different from original trial estimates and lack clinical validity, we will also present  
28 results from a fixed effect model. In this case, we will caution against overinterpretation of credible  
29 intervals. Markov chains will be run for a sufficient number of iterations to reach convergence,  
30 which we will assess on the basis of the Brooks-Gelman-Rubin diagnostic, with values less than  
31 1.05 considered acceptable if consistent with visual inspection of convergence and time series  
32 plots(44). All analyses will be performed in JAGS or similar software via the statistical program  
33 R(45,46).  
34  
35  
36  
37  
38  
39  
40  
41  
42  
43  
44  
45

### 46 **Assessment of Inconsistency**

47  
48 Inconsistency is the statistical manifestation of the violation of the transitivity assumption,  
49 which presents as a disagreement between direct and indirect estimates (loop inconsistency),  
50 and/or inconsistency between studies that inform the same treatment comparison, but include a  
51 different number of treatment arms (design inconsistency). To evaluate both design and loop  
52 inconsistency, we will apply the design-by-treatment interaction model with random inconsistency  
53  
54  
55  
56  
57  
58  
59  
60

1  
2  
3 effects (47,48). These findings will be interpreted within the context of the estimate of between-  
4 trial variance as these concepts are closely related and difficult to separate. For example, large  
5 estimates of between-trial variance are indicative of heterogeneity within direct comparisons but  
6 may also be the result of inconsistency between direct and indirect evidence.  
7  
8  
9

### 10 11 12 **Exploration of heterogeneity and inconsistency**

13 We will perform a network meta-regression using of potential effect modifiers to explore  
14 important heterogeneity and/or inconsistency. We propose, the following potential sources of  
15 heterogeneity, which could be possible effect modifiers: gestational age, birth weight and ROB.  
16 We hypothesize that lower gestational age, and low ROB will be related to less effectiveness of  
17 interventions. Overall risk of bias will be determined by taking the average of the three most  
18 important risk of bias items identified by expert consensus (sequence generation, allocation  
19 concealment, and blinding). Meta-regression models will assume a single shared coefficient for all  
20 non-baseline treatments(42). Interpretation of meta-regression models will be in keeping with  
21 suggestions from Dias et al., namely: (1) Inclusion of the coefficient leads to a decrease in the  
22 estimate of between-study variance; and (2) The 95% credible intervals of the estimated coefficient  
23 exclude the null (42).  
24  
25  
26  
27  
28  
29  
30  
31  
32  
33

### 34 **Sensitivity Analyses**

35 We plan to perform sensitivity analyses of different heterogeneity priors to assess the  
36 robustness of results(35,43,49). Further, findings from component models will be compared  
37 against a model without this assumption. In both cases, we will compare model fit using both  
38 absolute (residual deviance) and relative (DIC) measures as well as a qualitative assessment of  
39 whether the analysis leads to an important change in effect estimates.  
40  
41  
42  
43  
44  
45

### 46 **Rating the confidence in estimates of the effect**

47 We will assess the confidence in the estimates for each outcome using the GRADE  
48 approach (50). For this purpose, two authors will independently do the assessment. The  
49 confidence in the estimates will be based on four levels: high, moderate, low and very low. For  
50 the direct comparisons we will assess and rate each outcome based on the categories: ROB  
51 imprecision, inconsistency and publication bias(51-55). To assist with assessment of each  
52  
53  
54  
55  
56  
57  
58  
59  
60

1  
2  
3 domain, we will use threshold plots, which show the smallest change in study/contrast level  
4 estimates required to change the conclusions of the analysis.  
5

6 We will assess and rate the confidence in all the indirect comparisons –if available-  
7 obtained from first order loops following the GRADE categories used for assessing the direct  
8 comparisons in addition to the transitivity assessment. Transitivity, also called similarity(56), is  
9 the assumption that an indirect comparison is a valid method to compare two treatments that have  
10 not been compared in a head-to-head trial, because the studies are sufficiently similar in important  
11 clinical and methodological characteristics, or in other words, that they are similar in their  
12 distributions of effect modifiers(57,58). Then, we will rate the confidence in each NMA effect  
13 estimate using the higher rating when both direct and indirect evidence are present.  
14  
15  
16  
17  
18  
19

20 We will assess and rate the confidence in estimates of effect from the direct comparisons  
21 in our pairwise meta-analyses described previously. To rate the confidence in the indirect  
22 comparisons, we will focus our assessments on first-order loops (FOLs), i.e., loops connected to  
23 the interventions of interest through only one other intervention. For instance, if for A, B and C  
24 interventions, there are direct comparisons of A vs. B (AB) and B vs. C (BC), we will be able to  
25 indirectly estimate the effects of A vs. C (AC). The AC indirect estimation will be a FOL. We will  
26 choose the FOLs with the lowest variances for rating the confidence as they contribute the most to  
27 the estimates of effect.  
28  
29  
30  
31  
32  
33

34 Within FOLs, the indirect comparison confidence will be the lowest of the confidence  
35 ratings we have assigned to the contributing direct comparisons. For example, if we find that AB  
36 has moderate confidence and BC has high confidence, we will judge the associated indirect  
37 comparison, AC, as moderate confidence. We may rate down confidence in the indirect  
38 comparison, AC, as moderate confidence. We may rate down confidence in the indirect  
39 comparisons further if we have a strong suspicion that the transitivity assumption has been  
40 violated.  
41  
42  
43

44 Our overall judgment of confidence in the NMA estimate for any pairwise comparison will  
45 be the higher of the confidence rating amongst the contributing direct and indirect comparisons.  
46 However, we may rate down confidence in the network estimate if we find that the direct and  
47 indirect estimates have inconsistency. For this purpose, the GRADE approach recommends to  
48 assess the incoherence (or inconsistency as described in the ‘The Network Meta-Analysis’ section)  
49 criteria, which is defined as the differences between direct and indirect estimates of effect(59).  
50  
51  
52  
53  
54  
55  
56  
57  
58  
59  
60

### Multi-criteria Acceptability Analysis

Network meta-analyses provide an estimate of effect estimates of competing interventions, but this alone is not sufficient to aid decision making. We will aim to supplement this review with a stochastic multi-criteria acceptability analysis using methods defined by Tervonen, and Van Valkenhoef(60). These methods use a partial value function to allow for a quantitative risk-benefit analysis across multiple outcomes, given an ordinal ranking of importance for decision making (e.g. Mortality > BPD). Based on the best fitting NMA model, we will conduct stochastic multicriteria acceptability analyses (SMAA): One without preference criteria, and a second with preference criteria determined by expert consensus. Since SMAA is based on estimates constrained to the interval [0,1] we will calculate absolute risk of outcomes based on either a suitably designed observational trial or, if unavailable, a pooled control arm risk of included studies in the reference treatment(61). If treatments require the tradeoff of common (e.g. BPD) and very rare (e.g. mortality) events, we will use the 95% credible interval hull approach(62). The outputs of the SMAA will be a rankogram outlining the probability that a treatment is best, second best, etc., a vector of central weights, a confidence factor for the preference free model; and the rankogram for the ordered model. The vector of central weights provides a summary of the implied preferences required to hold an *a priori* preference for one treatment or another (i.e. the outcome preference implied by a clinician's current practice). The confidence factor is the probability that a treatment is best given these preferences, and is used as a measure of uncertainty.

### Discussion

Interventions in the immediate postnatal period may have long-term clinical implications. This NMA will provide the relative effectiveness of commonly practiced delivery room interventions for preterm infants born <33 weeks of gestation in preventing BPD. To the best of our knowledge this will be the first review that will examine the relative effectiveness of each delivery room intervention individually and in combination with respect to important clinical outcomes using novel statistical techniques. Its results will be of interest for a broad range of audience: practice guideline developers, pediatricians, neonatologists, policy makers and researchers, as it could be used to provide clinical recommendations for the choice of sequence of delivery room interventions.

1  
2  
3 Our review will have several methodological strengths. First, we will implement a wide  
4 comprehensive search to include published randomized clinical trials in the most important  
5 databases, as well as unpublished work. Second, we will use the novel method for rating the  
6 confidence in the estimates recommended by the GRADE working group. Third, we will employ  
7 a novel SMAA model to determine the most effective sequence of delivery room interventions  
8 with respect to the most important clinical outcomes(60). On the other hand, we anticipate some  
9 methodological challenges while undertaking such a review. We anticipate some degree of clinical  
10 heterogeneity while considering such a large number of competing and non-competing delivery  
11 room interventions. Based on the number of interventions identified following the systematic  
12 review, we may have to lump interventions into single nodes or split a node into multiple nodes to  
13 generate clinically meaningful results.  
14  
15  
16  
17  
18  
19  
20  
21

22 We hope that this review will provide an evidence based guide to choosing the right  
23 sequence of early postnatal interventions that will be associated with the least likelihood of  
24 inducing lung injury and BPD in preterm infants.  
25  
26  
27  
28  
29  
30  
31  
32  
33  
34  
35  
36  
37  
38  
39  
40  
41  
42  
43  
44  
45  
46  
47  
48  
49  
50  
51  
52  
53  
54  
55  
56  
57  
58  
59  
60

1  
2  
3  
4  
5  
6  
7  
8  
9  
10  
11  
12  
13  
14  
15  
16  
17  
18  
19  
20  
21  
22  
23  
24  
25  
26  
27  
28  
29  
30  
31  
32  
33  
34  
35  
36  
37  
38  
39  
40  
41  
42  
43  
44  
45  
46  
47  
48  
49  
50  
51  
52  
53  
54  
55  
56  
57  
58  
59  
60

**Figure legend:**

**Figure 1: Physiological sequence of potential delivery room interventions**

For peer review only

**Table 1. A priori defined outcome measures**

| Outcome Measure                        | Definition                                                                                                                                                                                                                                             |
|----------------------------------------|--------------------------------------------------------------------------------------------------------------------------------------------------------------------------------------------------------------------------------------------------------|
| Bronchopulmonary dysplasia             | No. of neonates who require oxygen at 36 weeks' postmenstrual age (PMA)                                                                                                                                                                                |
| Mortality                              | Death before discharge                                                                                                                                                                                                                                 |
| Severe intraventricular hemorrhage     | No. of neonates with grades 3-4 based on the Papile criteria                                                                                                                                                                                           |
| Air leak syndromes                     | No. of neonates with pneumothorax or pulmonary interstitial emphysema confirmed by chest X ray                                                                                                                                                         |
| Retinopathy of prematurity (any stage) | No. of neonates with any stage of Retinopathy of prematurity as per the international classification of Retinopathy of prematurity                                                                                                                     |
| Neurodevelopmental impairment          | No. of infants with any degree of neurodevelopmental impairment as assessed by a standardized and validated assessment tool, a child developmental specialist or both, at any age reported (outcome data grouped at 12, 18 and 24 months if available) |

## References

1. Bancalari E, Abdenour GE, Feller R, Gannon J. Bronchopulmonary dysplasia: clinical presentation. *Journal of Pediatrics* 1979;95(5 Pt 2):819-23.
2. Shennan AT, Dunn MS, Ohlsson A, Lennox K, Hoskins EM. Abnormal pulmonary outcomes in premature infants: prediction from oxygen requirement in the neonatal period. *Pediatrics* 1988;82(4):527-32.
3. Stoll BJ, Hansen NI, Bell EF, Walsh MC, Carlo WA, Shankaran S, Laptook AR, Sánchez PJ, Van Meurs KP, Wyckoff M, Das A, Hale EC, Ball MB, Newman NS, Schibler K, Poindexter BB, Kennedy KA, Cotten CM, Watterberg KL, D'Angio CT, DeMauro SB, Truog WE, Devaskar U, Higgins RD; Eunice Kennedy Shriver National Institute of Child Health and Human Development Neonatal Research Network. Trends in Care Practices, Morbidity, and Mortality of Extremely Preterm Neonates, 1993-2012. *JAMA*. 2015;314(10):1039-51.
4. Doyle LW, Faber B, Callanan C, Freezer N, Ford GW, Davis NM. Bronchopulmonary dysplasia in very low birth weight subjects and lung function in late adolescence. *Pediatrics* 2006; 118: 108–113.
5. Fawke J, Lum S, Kirkby J, Hennessy E, Marlow N, Rowell V et al. Lung function and respiratory symptoms at 11 years in children born extremely preterm: the Epicure study. *Am J Respir Crit Care Med* 2010; 182: 237–245.
6. Short EJ, Klein NK, Lewis BA, Fulton S, Eisengart S, Kercksmar C, Baley J, Singer LT. Cognitive and academic consequences of bronchopulmonary dysplasia and very low birth weight: 8-year-old outcomes. *Pediatrics*. 2003;112(5):e359
7. Twilhaar ES, Wade RM, de Kieviet JF, van Goudoever JB, van Elburg RM, Oosterlaan J. Cognitive Outcomes of Children Born Extremely or Very Preterm since the 1990s and



- 1  
2  
3 Associated Risk Factors: A Meta-analysis and Meta-regression. *JAMA Pediatr.*  
4 2018;172(4):361-367  
5  
6  
7  
8 8. Hillman NH, Moss TJM, Kallapur SG, Bachurski C, Pillow JJ, Polglase GR et al. Brief, large  
9 tidal volume ventilation initiates lung injury and a systemic response in fetal sheep. *Am J*  
10 *Respir Crit Care Med* 2007; 176: 575–581.  
11  
12  
13  
14 9. Wallace MJ, Probyn ME, Zahra VA, Crossley K, Cole TJ, Davis PG et al. Early biomarkers  
15 and potential mediators of ventilation-induced lung injury in very preterm lambs. *Respir Res*  
16 2009; 10: 19.  
17  
18  
19  
20  
21 10. Obladen M. Factors influencing surfactant composition in the newborn infant. *Eur J Pediatr*  
22 1978; 128: 129–143.  
23  
24  
25  
26 11. Heldt GP, McIlroy MB. Distortion of chest wall and work of diaphragm in preterm infants. *J*  
27 *Appl Physiol* (1985) 1987; 62: 164–169.  
28  
29  
30  
31 12. Heldt GP, McIlroy MB. Dynamics of chest wall in preterm infants. *J Appl Physiol* (1985)  
32 1987; 62: 170–174.  
33  
34  
35 13. Foglia EE, Jensen EA, Kirpalani H. State of the Art Review: Delivery room interventions to  
36 prevent bronchopulmonary dysplasia in extremely preterm infants. *Journal of perinatology :*  
37 *official journal of the California Perinatal Association.* 2017;37(11):1171-1179.  
38  
39  
40  
41 14. Rich WD, Leone T, Finer NN. Delivery room intervention: improving the outcome. *Clin*  
42 *Perinatol.* 2010;37(1):189-202  
43  
44  
45  
46 15. Fogarty M, Osborn DA, Askie LM, et al. Delayed vs early umbilical cord clamping for preterm  
47 infants: a systematic review and meta-analysis. *The American Journal of Obstetrics &*  
48 *Gynecology* 2018;218:1–18.  
49  
50  
51  
52  
53  
54  
55  
56  
57  
58  
59  
60

16. Schmölzer GM, Kumar M, Pichler G, et al. Non-invasive versus invasive respiratory support in preterm infants at birth: systematic review and meta-analysis. *BMJ* 2013;347:f5980
17. Pichler G, Urlesberger B, Schwabegger B, et al. Cerebral Oxygen Saturation to Guide Oxygen Delivery in Preterm Neonates for the Immediate Transition after Birth: A 2-Center Randomized Controlled Pilot Feasibility Trial. *J Pediatr* 2016;170:73–4.
18. Collaboration TC. The Cochrane Handbook for Systematic Reviews of Interventions Version 5.1.0. Higgins JPT, and Green, S., editor 2011.
19. Jansen JP, Crawford B, Bergman G, Stam W. Bayesian Meta-Analysis of Multiple Treatment Comparisons: An Introduction to Mixed Treatment Comparisons. *Value in Health*. 2008;11(5):956-64.
20. Jonas DE, Wilkins TM, Bangdiwala S, Bann CM, Morgan LC, Thaler KJ, Amick HR, Gartlehner G. Findings of Bayesian Mixed Treatment Comparison Meta-Analyses: Comparison and Exploration Using Real-World Trial Data and Simulation [Internet]. Rockville (MD): Agency for Healthcare Research and Quality (US); 2013 Feb. Available from <http://www.ncbi.nlm.nih.gov/books/NBK126109/> Accessed November 10, 2018.
21. Vento M, Cheung P-Y, Aguar M, et al. The first golden minutes of the extremely-low-gestational-age neonate: a gentle approach. *Neonatology* 2009;95:286–98.
22. Peleg B, Globus O, Granot M, et al. “Golden Hour” quality improvement intervention and short-term outcome among preterm infants. *J Perinatol* 2018;31:289.
23. Shah V, Hodgson K, Seshia M, et al. Golden hour management practices for infants <32 weeks gestational age in Canada. *Paediatr Child Health* 2018;23:70–6.

- 1  
2  
3  
4  
5  
6  
7  
8  
9  
10  
11  
12  
13  
14  
15  
16  
17  
18  
19  
20  
21  
22  
23  
24  
25  
26  
27  
28  
29  
30  
31  
32  
33  
34  
35  
36  
37  
38  
39  
40  
41  
42  
43  
44  
45  
46  
47  
48  
49  
50  
51  
52  
53  
54  
55  
56  
57  
58  
59  
60
24. Shamseer L, Moher D, Clarke M, Ghersi D, Liberati A, Petticrew M, Shekelle P, Stewart LA; PRISMA-P Group. Preferred reporting items for systematic review and meta-analysis protocols (PRISMA-P) 2015: elaboration and explanation. *BMJ*. 2015;350:g7647.
  25. Hutton B, Salanti G, Caldwell DM, Chaimani A, Schmid CH, Cameron C, et al. The PRISMA Extension Statement for Reporting of Systematic Reviews Incorporating Network Meta-analyses of Health Care Interventions: Checklist and Explanations. *Ann Intern Med*. 2015;162(11):777-84.
  26. Papile L-A, Burstein J, Burstein R, et al. Incidence and evolution of subependymal and intraventricular hemorrhage: a study of infants with birth weights less than 1,500 gm. *J Pediatr* 1978;92:529-34
  27. Covidence systematic review software, Veritas Health Innovation, Melbourne, Australia. Available at [www.covidence.org](http://www.covidence.org)
  28. PRISMA. Preferred Reporting Items for Systematic Reviews and Meta-Analyses [online]. [cited 2018 Accessed April 20]. Available from: <http://www.prisma-statement.org/statement.htm>
  29. Introduction to Evidence Synthesis. In: Network Meta-Analysis for Decision Making [Internet]. John Wiley & Sons, Ltd; 2018. p. 1-17. Available from: <https://onlinelibrary.wiley.com/doi/abs/10.1002/9781118951651.ch1>
  30. Riley RD, Higgins JP, Deeks JJ. Interpretation of random effects meta-analyses. *BMJ*. 2011;342.
  31. Higgins J, Thompson SG, Spiegelhalter DJ. A re-evaluation of random-effects meta-analysis. *Journal of the Royal Statistical Society: Series A (Statistics in Society)*. 2009;172(1):137-59.

- 1  
2  
3 32. Salanti G, Ades AE, Ioannidis JP. Graphical methods and numerical summaries for presenting  
4 results from multiple-treatment meta-analysis: an overview and tutorial. *Journal of clinical*  
5 *epidemiology*. 2011;64(2):163-71.  
6  
7  
8  
9  
10 33. Chaimani A, Higgins JPT, Mavridis D, Spyridonos P, Salanti G. Graphical Tools for Network  
11 *Meta-Analysis in STATA*. *PLoS One*. 2013;8(10).  
12  
13  
14 34. Mavridis D, Welton NJ, Salanti G. A selection model for accounting for publication bias in a  
15 *full network meta-analysis*. *Stat Med*. 2014;33:5399–412.  
16  
17  
18 35. Lambert PC, Sutton AJ, Burton PR, Abrams KR, Jones DR. How vague is vague? A simulation  
19 *study of the impact of the use of vague prior distributions in MCMC using WinBUGS*.  
20 *Statistics in medicine*. 2005;24(15):2401.  
21  
22  
23  
24 36. Cornell JE, Mulrow CD, Localio R, Stack CB, Meibohm AR, Guallar E, et al. Random-Effects  
25 *Meta-analysis of Inconsistent Effects: A Time for Change*. *Annals of Internal Medicine*.  
26 2014;160(4):267-70.  
27  
28  
29 37. DerSimonian R, Laird N. *Meta-analysis in clinical trials*. *Controlled clinical trials*.  
30 1986;7(3):177-88.  
31  
32  
33 38. Dias S, Sutton AJ, Ades AE, Welton NJ. *Evidence Synthesis for Decision Making 2: A*  
34 *Generalized Linear Modeling Framework for Pairwise and Network Meta-analysis of*  
35 *Randomized Controlled Trials*. *Med Decis Mak*. 2013;33:607.  
36  
37  
38 39. Gelman A, Carlin J, Stern H, Dunson D, Vehtari A, Rubin D. Chapter 2: Single Parameter  
39 *models*. In: *Bayesian data analysis*. Third Edit. New York: CRC Press; 2015.  
40  
41  
42 40. Gabry J, Simpson D, Vehtari A, Betancourt M, Gelman A. *Visualization in Bayesian*  
43 *workflow*. 2017;2. <http://arxiv.org/abs/1709.01449>.  
44  
45  
46  
47  
48  
49  
50  
51  
52  
53  
54  
55  
56  
57  
58  
59  
60

- 1  
2  
3  
4  
5  
6  
7  
8  
9  
10  
11  
12  
13  
14  
15  
16  
17  
18  
19  
20  
21  
22  
23  
24  
25  
26  
27  
28  
29  
30  
31  
32  
33  
34  
35  
36  
37  
38  
39  
40  
41  
42  
43  
44  
45  
46  
47  
48  
49  
50  
51  
52  
53  
54  
55  
56  
57  
58  
59  
60
41. Welton NJ, Caldwell DM, Adamopoulos E, Vedhara K. Mixed treatment comparison meta-analysis of complex interventions: Psychological interventions in coronary heart disease. *Am J Epidemiol*. 2009;169:1158–65.
  42. Dias S, Welton NJ, Sutton AJ, Ades AE. Evidence Synthesis for Decision Making 3: Subgroups, Meta-Regression, Bias, and Bias-Adjustment. *Med Decis Mak* [Internet]. 2013;33(5):597–606. Available from: <http://mdm.sagepub.com/content/33/5/597.full.pdf+html> Accessed November 10, 2018
  43. Turner RM, Davey J, Clarke MJ, Thompson SG, Higgins JP. Predicting the extent of heterogeneity in meta-analysis, using empirical data from the Cochrane Database of Systematic Reviews. *International journal of epidemiology*. 2012;41(3):818-27.
  44. Gelman A, Rubin DB. Inference from iterative simulation using multiple sequences. *Statistical science*. 1992:457-72.
  45. Plummer, M., 2016. JAGS: Just another Gibbs sampler. Available at <http://mcmc-jags.sourceforge.net/>. Accessed March, 14, 2017.
  46. R Core Team. R: A language and environment for statistical computing. 2018. <https://cran.r-project.org/>.
  47. Dias S, Welton NJ, Sutton AJ, Caldwell DM, Lu G, Ades a E. Evidence synthesis for decision making 4: inconsistency in networks of evidence based on randomized controlled trials. *Med Decis Making* [Internet]. 2013;33(5):641–56.
  48. Jackson D, Barrett JK, Rice S, White IR, Higgins JPT. A design-by-treatment interaction model for network meta-analysis with random inconsistency effects. *Stat Med*. 2014;33:3639–54.

- 1  
2  
3 49. Rhodes KM, Turner RM, Higgins JP. Predictive distributions were developed for the extent of  
4  
5 heterogeneity in meta-analyses of continuous outcome data. *J Clin Epidemiol*. 2015;68(1):52-  
6  
7 60.  
8  
9  
10 50. Guyatt G, Oxman AD, Akl EA, Kunz R, Vist G, Brozek J, et al. GRADE guidelines: 1.  
11  
12 Introduction—GRADE evidence profiles and summary of findings tables. *Journal of clinical*  
13  
14 *epidemiology*. 2011;64(4):383-94.  
15  
16  
17 51. Balshem H, Helfand M, Schünemann HJ, Oxman AD, Kunz R, Brozek J, et al. GRADE  
18  
19 guidelines: 3. Rating the quality of evidence. *Journal of clinical epidemiology*.  
20  
21 2011;64(4):401-6.  
22  
23  
24 52. Guyatt GH, Oxman AD, Vist G, Kunz R, Brozek J, Alonso-Coello P, et al. GRADE guidelines:  
25  
26 4. Rating the quality of evidence—study limitations (risk of bias). *Journal of clinical*  
27  
28 *epidemiology*. 2011;64(4):407-15.  
29  
30  
31 53. Guyatt GH, Oxman AD, Kunz R, Brozek J, Alonso-Coello P, Rind D, et al. GRADE guidelines  
32  
33 6. Rating the quality of evidence—imprecision. *Journal of clinical epidemiology*.  
34  
35 2011;64(12):1283-93.  
36  
37  
38 54. Guyatt GH, Oxman AD, Kunz R, Woodcock J, Brozek J, Helfand M, et al. GRADE guidelines:  
39  
40 7. Rating the quality of evidence—inconsistency. *Journal of clinical epidemiology*.  
41  
42 2011;64(12):1294-302.  
43  
44  
45 55. Guyatt GH, Oxman AD, Montori V, Vist G, Kunz R, Brozek J, et al. GRADE guidelines: 5.  
46  
47 Rating the quality of evidence—publication bias. *Journal of clinical epidemiology*.  
48  
49 2011;64(12):1277-82.  
50  
51  
52 56. Donegan S, Williamson P, Gamble C, Tudur-Smith C. Indirect comparisons: a review of  
53  
54 reporting and methodological quality. *PLoS One*. 2010;5(11):e11054.  
55  
56  
57  
58  
59

- 1  
2  
3 57. Baker SG, Kramer BS. The transitive fallacy for randomized trials: if A bests B and B bests C  
4 in separate trials, is A better than C? *BMC Med Res Methodol*. 2002;2:13.  
5  
6  
7  
8 58. Cipriani A, Higgins JP, Geddes JR, Salanti G. Conceptual and technical challenges in network  
9 meta-analysis. *Annals of internal medicine*. 2013;159(2):130-7.  
10  
11  
12 59. Puhan MA, Schunemann HJ, Murad MH, Li T, Brignardello-Petersen R, Singh JA, et al. A  
13 GRADE Working Group approach for rating the quality of treatment effect estimates from  
14 network meta-analysis. *BMJ*. 2014;349:g5630.  
15  
16  
17  
18  
19 60. Van Valkenhoef G, Tervonen T, Zhao J, De Brock B, Hillege HL, Postmus D. Multicriteria  
20 benefit-risk assessment using network meta-analysis. *J Clin Epidemiol*. 2012;65:394–403.  
21  
22  
23 61. Dias S, Welton NJ, Sutton AJ, Ades AE. Evidence synthesis for decision making 5: The  
24 baseline natural history model. *Med Decis Mak*. 2013;33(5):657–70.  
25  
26  
27  
28 62. Tervonen T. New directions in Stochastic Multicriteria Acceptability Analysis. 2007 Dec 1  
29 [cited 2018 Nov 11]; Available from: <http://www.utupub.fi/handle/10024/28151>  
30  
31  
32  
33  
34  
35  
36  
37  
38  
39  
40  
41  
42  
43  
44  
45  
46  
47  
48  
49  
50  
51  
52  
53  
54  
55  
56  
57  
58  
59  
60

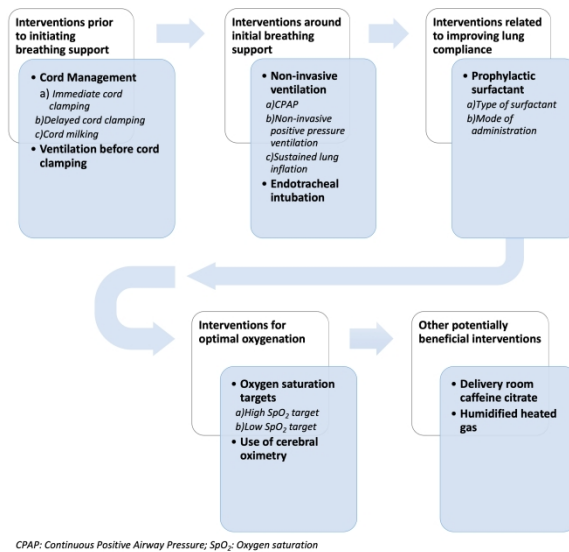

Figure 1: Physiological sequence of potential delivery room interventions

903x508mm (144 x 144 DPI)



## Appendix 1: Search strategy for EMBASE, Medline, and PubMed

### EMBASE

(newborn OR infant OR neonate OR preterm OR premature) AND [randomized controlled trial]/lim

AND

(continuous AND positive AND airway AND pressure OR cpap OR (nasal AND continuous AND positive AND airway AND pressure) OR ncpap OR (positive AND pressure AND ventilation) OR (intermittent AND positive AND pressure AND ventilation) OR (sustained AND lung AND inflation) OR (sustained AND inflation) OR si) AND [randomized controlled trial]/lim

OR

(supplemental AND oxygen OR (supplemental AND oxygen AND during AND resuscitation) OR oxygen OR surfactant OR (surfactant AND administration) OR (surfactant AND administration, AND early) OR (surfactant AND administration, AND late) OR (minimally AND invasive AND surfactant AND therapy) OR ('less invasive' AND surfactant AND administration)) AND [randomized controlled trial]/lim

OR

(lisa OR intubation OR (endotracheal AND intubation) OR (mechanical AND ventilation) OR caffeine OR (caffeine AND citrate) OR (respiratory AND function AND monitor) OR (delayed AND cord AND clamping) OR (cord AND milking)) AND [randomized controlled trial]/lim

AND

(randomized AND controlled AND trial OR 'randomized controlled trial':it OR (clinical AND trial)) AND [randomized controlled trial]/lim

AND

[randomized controlled trial]/lim AND [embase]/lim AND ([embryo]/lim OR [fetus]/lim OR [newborn]/lim OR [infant]/lim)

Limited to embryo from Age Groups fetus from Age Groups newborn from Age Groups infant from Age Groups

## Medline

| Set | <input type="button" value="Run Search"/> <b>MEDLINE</b><br>Search History - " BPD"                                                                                                                                                                                                                                                                                                                                                                                                                                                                                                                                                                                                                                                                                                                                                                             |
|-----|-----------------------------------------------------------------------------------------------------------------------------------------------------------------------------------------------------------------------------------------------------------------------------------------------------------------------------------------------------------------------------------------------------------------------------------------------------------------------------------------------------------------------------------------------------------------------------------------------------------------------------------------------------------------------------------------------------------------------------------------------------------------------------------------------------------------------------------------------------------------|
| #5  | #3 AND #2 AND #1<br>Refined by: <b>PUBLICATION TYPES:</b> (RANDOMIZED CONTROLLED TRIAL)<br><i>DocType=All document types; Language=All languages;</i>                                                                                                                                                                                                                                                                                                                                                                                                                                                                                                                                                                                                                                                                                                           |
| #4  | #3 AND #2 AND #1<br><i>DocType=All document types; Language=All languages;</i>                                                                                                                                                                                                                                                                                                                                                                                                                                                                                                                                                                                                                                                                                                                                                                                  |
| #3  | (MH=randomized controlled trial OR TS=randomized controlled trial OR TS=clinical trial) AND <b>DOCUMENT TYPES:</b> (Randomized Controlled Trial)<br><i>DocType=All document types; Language=All languages;</i>                                                                                                                                                                                                                                                                                                                                                                                                                                                                                                                                                                                                                                                  |
| #2  | TS=continuous positive airway pressure OR TS=CPAP OR TS=nasal continuous positive airway pressure OR TS=nCPAP OR TS=positive pressure ventilation OR TS=intermittent positive pressure ventilation OR TS=sustained lung inflation OR TS=sustained inflation OR TS=SI OR TS=supplemental oxygen OR TS=supplemental oxygen during resuscitation OR TS=oxygen OR TS=surfactant OR TS=surfactant administration OR TS=surfactant administration, early OR TS=surfactant administration, late OR TS=minimally invasive surfactant therapy OR TS=less-invasive surfactant administration OR TS=LISA OR TS=intubation OR TS=endotracheal intubation OR TS=mechanical ventilation OR TS=caffeine OR TS=caffeine citrate OR TS=respiratory function monitor OR TS=delayed cord clamping OR TS=cord milking<br><i>DocType=All document types; Language=All languages;</i> |
| #1  | TS=newborn OR TS=premature OR TS=infant OR TS=neonate OR TS=preterm<br><i>DocType=All document types; Language=All languages;</i>                                                                                                                                                                                                                                                                                                                                                                                                                                                                                                                                                                                                                                                                                                                               |

## PubMed

- #1 MeSH descriptor: [Infant] explode all trees
- #2 infant\*:ti,ab
- #3 neonat\*:ti,ab
- #4 newborn\*:ti,ab
- #5 preterm:ti,ab
- #6 premature:ti,ab
- #7 #1 or #2 or #3 or #4 or #5 or #6
- #8 "continuous positive airway pressure":ti,ab
- #9 "positive pressure ventilation":ti,ab
- #10 (sustained near/2 inflation):ti,ab
- #11 (supplemental near/2 oxygen):ti,ab
- #12 oxygen:ti,ab
- #13 surfactant:ti,ab
- #14 intubation:ti,ab
- #15 (mechanical\* near/1 ventilat\*):ti,ab
- #16 caffeine:ti,ab
- #17 "respiratory function monitor":ti,ab
- #18 (cord near/2 ((clamping and delayed) or milking)):ti,ab
- #19 #8 or #9 or #10 or #11 or #12 or #13 or #14 or #15 or #16 or #17 or #18

1  
2  
3 #20 #7 and #19  
4  
5  
6  
7  
8  
9  
10  
11  
12  
13  
14  
15  
16  
17  
18  
19  
20  
21  
22  
23  
24  
25  
26  
27  
28  
29  
30  
31  
32  
33  
34  
35  
36  
37  
38  
39  
40  
41  
42  
43  
44  
45  
46  
47  
48  
49  
50  
51  
52  
53  
54  
55  
56  
57  
58  
59  
60

For peer review only

# BMJ Open

## Delivery Room Interventions to Prevent Bronchopulmonary Dysplasia in Preterm Infants: A Protocol for a Systematic Review and Network Meta-Analysis

|                                 |                                                                                                                                                                                                                                                                                                                                                                                                                                                                                                                                                                                                                                                                                                                                                                                                          |
|---------------------------------|----------------------------------------------------------------------------------------------------------------------------------------------------------------------------------------------------------------------------------------------------------------------------------------------------------------------------------------------------------------------------------------------------------------------------------------------------------------------------------------------------------------------------------------------------------------------------------------------------------------------------------------------------------------------------------------------------------------------------------------------------------------------------------------------------------|
| Journal:                        | <i>BMJ Open</i>                                                                                                                                                                                                                                                                                                                                                                                                                                                                                                                                                                                                                                                                                                                                                                                          |
| Manuscript ID                   | bmjopen-2018-028066.R2                                                                                                                                                                                                                                                                                                                                                                                                                                                                                                                                                                                                                                                                                                                                                                                   |
| Article Type:                   | Protocol                                                                                                                                                                                                                                                                                                                                                                                                                                                                                                                                                                                                                                                                                                                                                                                                 |
| Date Submitted by the Author:   | 07-Jun-2019                                                                                                                                                                                                                                                                                                                                                                                                                                                                                                                                                                                                                                                                                                                                                                                              |
| Complete List of Authors:       | Mitra, Souvik; Dalhousie University, IWK Health Center, Department of Pediatrics<br>Disher, Timothy; School of Nursing, Dalhousie University<br>Pichler, Gerhard; Medical University of Graz, Research Unit for Neonatal Micro- and Macrocirculation, Department of Pediatrics<br>D'Souza, Brandon; IWK Health Centre, Department of Respiratory Therapy<br>Mccord, Helen; Dalhousie University, IWK Health Center, Department of Pediatrics<br>Chayapathi, Varsha; Dalhousie University, IWK Health Center, Department of Pediatrics<br>Jones, Karlee; Dalhousie University, IWK Health Center, Department of Pediatrics<br>Schmölzer, Georg; Royal Alexandra Hospital, Centre for the Studies of Asphyxia and Resuscitation, Neonatal Research Unit, ; University of Alberta, Department of Pediatrics |
| <b>Primary Subject Heading</b>: | Paediatrics                                                                                                                                                                                                                                                                                                                                                                                                                                                                                                                                                                                                                                                                                                                                                                                              |
| Secondary Subject Heading:      | Research methods                                                                                                                                                                                                                                                                                                                                                                                                                                                                                                                                                                                                                                                                                                                                                                                         |
| Keywords:                       | Infants, Bronchopulmonary dysplasia, Delivery Room, Newborn                                                                                                                                                                                                                                                                                                                                                                                                                                                                                                                                                                                                                                                                                                                                              |
|                                 |                                                                                                                                                                                                                                                                                                                                                                                                                                                                                                                                                                                                                                                                                                                                                                                                          |

SCHOLARONE™  
Manuscripts

1  
2  
3 **Delivery Room Interventions to Prevent Bronchopulmonary Dysplasia in Preterm**  
4  
5 **Infants: A Protocol for a Systematic Review and Network Meta-Analysis**  
6

7  
8 Souvik Mitra MD MSc<sup>1</sup>, Timothy Disher PhD(c), RN<sup>2</sup>, Gerhard Pichler MD<sup>3</sup>, Brandon D'Souza  
9  
10 BHSc, RRT<sup>6</sup>, Helen Mccord MN<sup>1</sup>, Varsha Chayapathi MBBS, DNB<sup>1</sup>, Karlee Jones BScPharm,  
11  
12 ACPR<sup>1</sup>, Georg M. Schmölder MD, PhD<sup>4,5</sup>  
13

14  
15 <sup>1</sup>Department of Pediatrics, Dalhousie University, IWK Health Center, Halifax, Canada

16  
17 <sup>2</sup>School of Nursing, Dalhousie University, Halifax Nova Scotia, Canada

18  
19 <sup>3</sup>Research Unit for Neonatal Micro- and Macrocirculation, Department of Pediatrics, Medical  
20  
21 University of Graz, Austria  
22

23  
24 <sup>4</sup>Centre for the Studies of Asphyxia and Resuscitation, Neonatal Research Unit, Royal Alexandra  
25  
26 Hospital, Edmonton, Alberta, Canada  
27

28  
29 <sup>5</sup>Department of Pediatrics, University of Alberta, Edmonton, Alberta, Canada

30  
31 <sup>6</sup>Department of Respiratory Therapy, IWK Health Centre, Halifax, Nova Scotia, Canada  
32  
33

34  
35 **Corresponding author:**  
36

37  
38 Georg M. Schmölder, MD, PhD

39  
40 Centre for the Studies of Asphyxia and Resuscitation,

41  
42 Neonatal Research Unit, Royal Alexandra Hospital,

43  
44 10240 Kingsway Avenue NW,

45  
46 T5H 3V9, Edmonton, Alberta, Canada

47  
48 Telephone +1 780 735 4660

49  
50  
51 Fax: +1 780 735 4072

52  
53  
54 Email: [georg.schmoelzer@me.com](mailto:georg.schmoelzer@me.com)  
55  
56  
57  
58  
59  
60

**Conflict of Interest:**

SM, GP, VC, have declared no conflict of interest. TD provides methodological advice for Cornerstone Research Group Inc. Cornerstone Research Group Inc. consults for various pharmaceutical and medical device companies. BD has provided device training and educational presentations to clinicians on behalf of Mallinckrodt Pharmaceuticals. GMS has registered the RETAIN neonatal resuscitation board (Tech ID 2017083) and RETAIN neonatal resuscitation video game (Tech ID 2017086) under Canadian copyright, and GMS is the owner of RETAIN Labs Inc. (<https://www.playretain.com>), which is distributing these games.

**Keywords:** INFANTS, NEWBORN, DELIVERY ROOM, BRONCHOPULMONARY DYSPLASIA

**Funding sources**

We would like to thank the public for donating money to our funding agencies: GMS is a recipient of the Heart and Stroke Foundation/University of Alberta Professorship of Neonatal Resuscitation, a National New Investigator of the Heart and Stroke Foundation Canada and an Alberta New Investigator of the Heart and Stroke Foundation Alberta. This research has been facilitated by the Women and Children's Health Research Institute through the generous support of the Stollery Children's Hospital Foundation.

**Abstract: 250 words**

**Manuscript: 3,963 words**

**Tables: 1**

1  
2  
3 **Figures: 1**  
4  
5  
6  
7

8 **Author's contribution:**  
9

10 Conception and design: GMS, SM  
11

12 Data analysis plan: GMS, SM, GP, TD, BDS, HM, VC, KJ  
13

14 Drafting of the article: GMS, SM, GP, TD, BDS, HM, VC, KJ  
15

16  
17 Critical revision of the article for important intellectual content: GMS, SM, GP, TD, BDS, HM,  
18  
19 VC, KJ  
20

21 Final approval of the article: GMS, SM, GP, TD, BDS, HM, VC, KJ  
22  
23  
24  
25

26 The Corresponding Author has the right to grant on behalf of all authors and does grant on behalf of  
27 all authors, an exclusive licence (or non-exclusive for government employees) on a worldwide basis  
28 to the BMJ Publishing Group Ltd and its Licensees to permit this article (if accepted) to be published  
29 in BMJ Open and any other BMJ PGL products to exploit all subsidiary rights, as set out in our  
30 licence <http://authors.bmj.com/submitting-your-paper/copyright-and-authors-rights/> and the  
31 Corresponding Author accepts and understands that any supply made under these terms is made by  
32 BMJ PGL to the Corresponding Author. Where the Corresponding Author wishes to make the article  
33 available on an open access basis (and intends to pay the relevant open access fee), the terms of  
34 such open access shall be governed by a [Creative Commons](#) licence – details of these licences and  
35 which Creative Commons licence will apply to this article are set out in our licence referred to above.  
36  
37  
38  
39  
40  
41  
42  
43  
44  
45  
46  
47  
48  
49  
50  
51  
52  
53  
54  
55  
56  
57  
58  
59  
60

**Abbreviations:**

|           |                                                                                 |
|-----------|---------------------------------------------------------------------------------|
| BPD       | - Bronchopulmonary dysplasia                                                    |
| ELGAN     | - Extremely low gestational age newborns                                        |
| IQ        | - Intelligence quotient                                                         |
| CPAP      | - Continuous positive airway pressure                                           |
| NMA       | - Network meta-analysis                                                         |
| RE        | - Random-effects model                                                          |
| RCT       | - Randomized controlled trials                                                  |
| INSURE    | - Intubate-Surfactant-Extubate technique                                        |
| LISA/MIST | - Less-invasive surfactant administration/minimally invasive surfactant therapy |
| ROB       | - Risk of bias                                                                  |
| CrIs      | - Credible intervals                                                            |
| RR        | - Risk ratio                                                                    |
| SUCRA     | - Surface Under the Cumulative Ranking curve                                    |
| FE        | - Fixed-effect model                                                            |
| FOL       | - First-order loops                                                             |
| SMAA      | - Stochastic multicriteria acceptability analysis                               |



## Abstract

### Introduction

As gestational age decreases, incidence of bronchopulmonary dysplasia (BPD) and chronic lung disease increases. There are many interventions used in the delivery room to prevent acute lung injury and consequently BPD in these patients. The availability of different treatment options often poses a practical challenge to the practicing neonatologist when it comes to making an evidence based choice as the multitude of pairwise systematic reviews including Cochrane reviews that are currently available only provide a narrow perspective through head-to-head comparisons.

### Methods and Analysis

We will conduct a systematic review of all randomized controlled trials evaluating delivery room interventions within the 1st golden hour after birth for prevention of BPD. The primary outcome BPD. Secondary outcomes include death at 36 weeks' postmenstrual age or before discharge; severe intraventricular hemorrhage (grade 3 or 4 based on the Papile criteria); any air leak syndromes (including pneumothorax or pulmonary interstitial emphysema); retinopathy of prematurity (any stage) and neurodevelopmental impairment at 18-24 months. We will search from their inception to August 2018, the following databases: Medline, EMBASE, and Cochrane Central Register of Controlled Trials (CENTRAL) as well as grey literature resources. Two reviewers will independently screen titles and abstracts, review full texts, extract information, and assess the risk of bias (ROB) and the confidence in the estimate (with Grading of Recommendations Assessment, Development and Evaluation (GRADE) approach). This review will use Bayesian network meta-analysis approach which allows the comparison of the multiple delivery room interventions for prevention of BPD. We will perform a Bayesian network meta-analysis to combine the pooled direct and indirect treatment effect estimates for each outcome, effectiveness, and safety of delivery room interventions for prevention of BPD.

### Ethics and Dissemination

The proposed protocol is a network meta-analysis, which has been registered on PROSPERO International prospective register of systematic reviews (CRD42018078648). The results will provide an evidence based guide to choosing the right sequence of early postnatal interventions that will be associated with the least likelihood of inducing lung injury and BPD in preterm infants. Furthermore, we will identify knowledge gaps and will encourage further research for other

1  
2  
3 therapeutic options. Therefore, its results will be disseminated through peer-reviewed publications  
4 and conference presentations. Due to the nature of the design, no ethics approval is necessary.

### 5 6 **Strengths and limitations of this study**

#### 7 8 **Strengths:**

- 9  
10 • Comprehensive search to include published randomized clinical trials in the most important  
11 databases, as well as unpublished work
- 12  
13 • Use the novel method for rating the confidence in the estimates recommended by the  
14 GRADE working group
- 15  
16 • We will employ a novel Stochastic multicriteria acceptability analysis model to determine  
17 the most effective sequence of delivery room interventions with respect to the most  
18 important clinical outcomes

#### 19 20 **Limitations:**

- 21  
22 • We anticipate some degree of clinical heterogeneity while considering such a large number  
23 of competing and non-competing delivery room interventions
  - 24  
25 • Potential to lump interventions into single nodes or split a node into multiple nodes to  
26 generate clinically meaningful results
- 27  
28  
29  
30  
31  
32  
33  
34  
35  
36  
37  
38  
39  
40  
41  
42  
43  
44  
45  
46  
47  
48  
49  
50  
51  
52  
53  
54  
55  
56  
57  
58  
59  
60

## Introduction

Bronchopulmonary dysplasia (BPD) is the most common chronic respiratory morbidity associated with premature birth. BPD is defined as either need of supplemental oxygen at i) 28 days postnatal age(1), or ii) 36 weeks' postmenstrual age with or without compatible clinical and radiographic findings(2). BPD affects 30-60% of prematurely born infants with the incidence being inversely proportional to gestational age(3). With increased survival of extremely low gestational age newborns (ELGAN), the incidence of BPD continues to increase despite improvement in neonatal care practices over the last two decades(3). BPD is known to be associated with long-term respiratory morbidity that persists into adolescence and adulthood(4,5). There is also increasing evidence that BPD and duration on supplemental oxygen have long-term adverse effects on cognitive and academic achievement with each percent increase in BPD rate being associated with a 0.01 standard deviation decrease in intelligence quotient (IQ) (0.15 IQ points) ( $p < 0.001$ )(6,7).

Several antenatal, perinatal, and postnatal factors contribute to the development of BPD. It is postulated that early lung injury and inflammation play an important role in the pathogenesis of BPD (8,9). In the fetus, the gas exchange organ is the placenta and the function of gas exchange is transferred from the placenta to the lungs immediately after birth. Therefore, the newborn infant's lungs must open and be aerated to allow the transition from fetal to postnatal circulation and physiology. However, in ELGANs, several physiological factors prevent this transition. These include lack of surfactant leading to increased alveolar surface tension, non-compliant chest wall, and weak respiratory muscles(10-12). Therefore, most ELGANs require assisted ventilation and/or supplemental oxygen after birth to ensure optimal gas exchange. However, both therapies may also induce lung inflammation due to barotrauma and/or volutrauma and oxygen-free radical generation thereby initiating the pathogenesis of BPD. Therefore, any interventions targeted at limiting lung injury and oxidative stress during resuscitation in the delivery room immediately after the birth may help to prevent the development of BPD or reduce its severity.

A number of clinical trials have been conducted on a variety of delivery room interventions, including i) interventions prior to initiating breathing support (i.e., clamping vs. milking the umbilical cord); ii) interventions around initial breathing support (i.e., continuous positive airway pressure (CPAP), non-invasive positive pressure ventilation, sustained lung inflation or endotracheal intubation); iii) interventions related to improving lung compliance (i.e., prophylactic

1  
2  
3 surfactant therapy including the different variations in its administration modalities); iv)  
4 interventions related to minimizing oxidative stress (i.e., higher vs. lower oxygen saturation  
5 targets), v) use of cerebral oximetry, and vi) other potentially beneficial therapies such as caffeine  
6 administration (Figure 1)(13,14).  
7  
8  
9

10 The availability of multiple potential interventions in a resuscitation scenario often poses  
11 a practical challenge to health care professionals as to which sequence of interventions would  
12 provide the greatest likelihood of minimizing BPD and which interventions are unnecessary and  
13 unlikely to be of any benefit(13). There have been previous systematic reviews and pairwise meta-  
14 analyses on the different competing interventions such as initial breathing support and oxygen  
15 saturation targets(15-17). However, these meta-analyses, though well conducted, provide a narrow  
16 perspective to the situation where a sequence of non-competing interventions occur within a short  
17 time-frame whereas each intervention has potentially competing variations. Use of a network  
18 meta-analysis (NMA) framework may help to provide a more feasible, comprehensive and  
19 evidence-based solution to the dilemma that health care professionals face during resuscitation of  
20 ELGANs with regards to multiple competing interventions aimed at mitigating lung injury. The  
21 Cochrane handbook considers NMA as a highly valuable tool to evaluate and rank treatment  
22 options according to their safety and effectiveness(18). Bayesian NMA have been proposed as an  
23 effective method for evaluating the effectiveness of multiple competing interventions(18-20).  
24 Delivery room interventions consist of a sequence of non-competing category of interventions and  
25 within each category there are several potentially competing interventions (Figure 1). Given that  
26 many of these competing delivery room interventions have not been compared in head-to-head  
27 studies, we expect that some of the possible comparisons between the interventions will not have  
28 direct evidence. Hence, we will perform a random effects network meta-analysis (NMA). Delivery  
29 room interventions will be defined as all potential interventions in the immediate postnatal  
30 period(21-23).  
31  
32  
33  
34  
35  
36  
37  
38  
39  
40  
41  
42  
43  
44  
45  
46  
47

## 48 **OBJECTIVES**

49 To determine the relative effectiveness of commonly practiced delivery room interventions  
50 for preterm infants born <33 weeks of gestation in preventing BPD using a Bayesian network  
51 meta-analysis.  
52  
53  
54  
55  
56  
57  
58  
59  
60

## METHODS & DESIGN

This systematic review and NMA protocol has been registered on PROSPERO International prospective register of systematic reviews (CRD42018078648). This protocol was developed following the Preferred reporting items for systematic review and meta-analysis protocols (PRISMA-P) guidance(24). The final report will comply with the recommendations of the PRISMA Extension Statement for Reporting of Systematic Reviews Incorporating Network Meta-analyses of Health Care Interventions(25).

### Search Strategy

We will search from their inception to August 2018, the following databases: MEDLINE, EMBASE and the Cochrane Central Register of Controlled Trials (CENTRAL). We will use combination of controlled terms (Medical Subject Heading, MeSH, and Emtree), and free-text terms with various synonyms for the different possible delivery room interventions and BPD. Search alerts will be set up for monthly notification and the search will be repeated before the final manuscript submission to identify any new relevant trials. Search strategies have been developed with liaison with an experienced librarian. No language, publication status or date limit will be used. The search strategies have been detailed in appendix A.

We will seek registered details of selected trials in the U.S. National Institutes of Health resource ([www.clinicaltrials.gov](http://www.clinicaltrials.gov)) and the WHO International Clinical Trials Registry Platform Search Portal. We intend to obtain additional grey literature from personal communication from experts in the field, reviewing the reference lists of relevant articles, abstracts and conference proceedings (Society for Pediatric Research, European Society for Pediatric Research) and seeking results of unpublished trials. We intend to contact authors of unpublished work and authors of published trials in order to clarify information that is not clear in the articles.

### Eligibility Criteria

We will include randomized controlled trials (RCTs) that evaluate the effectiveness of commonly practiced delivery room interventions. Studies will have to have the following characteristics regarding participants, intervention, control and type of study.

- a) Participants: Preterm infants (<33 weeks) requiring intervention(s) during neonatal transition within the 1<sup>st</sup> golden hour after birth

- 1  
2  
3 b) Interventions include the following: i) cord management (including immediate cord clamping,  
4 delayed cord clamping, cord milking, and/or resuscitation attached to the cord); ii) respiratory  
5 support (including positive pressure ventilation, CPAP, sustained lung inflation, and/or  
6 intubation, and mechanical ventilation); iii) surfactant delivery (type of surfactant delivered  
7 via endotracheal tube or laryngeal mask, INSURE (Intubate-Surfactant-Extubate) technique,  
8 LISA/MIST (less-invasive surfactant administration/minimally invasive surfactant therapy),  
9 and/or nebulized surfactant administration; iv) initial fractional concentration of inspired  
10 oxygen ( $FiO_2$ ) ( $\leq 0.3$  or  $\geq 0.6$ ); v) monitoring during resuscitation (respiratory function monitor,  
11 near-infrared spectroscopy); vi) medication (e.g., caffeine citrate, or diuretics); vii) use of  
12 heated, humidified gas  
13  
14 c) Comparator: One or more of the above interventions compared to each other or no treatment.  
15 Since interventions possible in a delivery room are largely related to delivery room resources, we  
16 have *a priori* decided to only include interventions that the infants were subjected to in the  
17 immediate postnatal period irrespective of whether these interventions were physically carried out  
18 in the room where the infant was born. Studies that examined interventions that were carried out  
19 after the initial stabilization period (no randomization within the first hour after birth e.g., feeding,  
20 indomethacin, antibiotics) will be excluded from the review. Furthermore, studies must have  
21 randomized within the first hour after birth to be eligible. This approach potentially will include  
22 studies with randomization within the first hour after birth but study intervention administration  
23 within the first two hours after birth (e.g. surfactant or caffeine administration).  
24  
25  
26  
27  
28  
29  
30  
31  
32  
33  
34  
35  
36  
37  
38  
39

## 40 Outcomes

41 Our primary outcome is bronchopulmonary dysplasia (defined as oxygen requirement at  
42 36 weeks' postmenstrual age). Secondary outcomes include death at 36 weeks' postmenstrual age  
43 or before discharge; severe intraventricular hemorrhage (grade 3 or 4 based on the Papile  
44 criteria)(26); any air leak syndromes (including pneumothorax or pulmonary interstitial  
45 emphysema); retinopathy of prematurity (any stage) and neurodevelopmental impairment at 18-  
46 24 months. All the outcomes, its definitions and measures are detailed in the table 1. We aim to  
47 perform one subgroup analysis comparing infants <28 weeks versus 29-32 weeks.  
48  
49  
50  
51  
52  
53  
54

## 55 Patient and Public Involvement

56  
57  
58  
59  
60

1  
2  
3 Neither patients nor public were involved in the development of the research question or  
4 design of this study. This network meta-analysis does not recruit any patients. The study will be  
5 published and presented at conferences to healthcare professionals.  
6  
7  
8  
9

### 10 **Study selection**

11 The titles and abstracts retrieved will be screened by two independent reviewers in  
12 duplicate to assess its eligibility using the Covidence platform (27). As a second step, the full text  
13 articles of the potentially eligible studies will be screened to assess their eligibility. We will include  
14 the full text of all studies for which both reviewers agree about their inclusion. For both steps, any  
15 disagreements between the reviewers will be resolved by discussion and if no agreement can be  
16 reached, a third member of the team will decide whether the study shall be included or not. We  
17 will refer to inclusion and exclusion criteria during the screening process. Records of ineligible  
18 full text articles along with the reason for ineligibility will be saved for future reference. Eligible  
19 articles citations will be uploaded to Covidence. We will present the PRISMA flow diagram(28)  
20 demonstrating the search and screening process.  
21  
22  
23  
24  
25  
26  
27  
28  
29  
30

### 31 **Data Abstraction**

32 A pre-specified standardized data extraction form in a Microsoft Excel sheet will be used  
33 to extract the data from the eligible studies. The data extraction form will be pilot tested  
34 independently by all reviewers before its use, to standardize the process. Eight reviewers will carry  
35 out the extraction, working independently in pairs and in duplicate. In case of disagreement in  
36 assessing the methodological quality of the study we will try to resolve it by consensus. If  
37 consensus cannot be reached a third designated reviewer will be involved. We will contact authors  
38 of primary studies, during data extraction, to provide any missing information.  
39  
40  
41  
42  
43  
44  
45

### 46 **Node Formation**

47 Within each component of the stabilization pathway, we anticipate the identification  
48 numerous similar non-competing interventions (e.g. multiple synthetic and natural surfactants). In  
49 an iterative process, clinical experts (GS, SM, GP) blinded to the implications for effect estimates,  
50 will come to consensus on definitions of nodes and be presented with the implications of those  
51 decisions via network diagrams (e.g. lumping causing the loss of trials comparing lumped  
52  
53  
54  
55  
56  
57  
58  
59  
60



1  
2  
3 interventions, splitting causing disconnected networks). Experts will then be asked to identify  
4 whether groups of treatments should be defined as classes (e.g. natural vs synthetic surfactant) or  
5 lumped together. Class-based models have the advantage of offering an estimate of class effect as  
6 well as shrunken effects of individual treatments, while lumping can allow for more robust  
7 estimation of between-trial variability, and can reduce the probability of chance violations of NMA  
8 assumptions. This process will be repeated until a consensus decision is reached on the node  
9 making algorithm that meets the criteria of satisfying clinical demands, preserving the assumption  
10 that interventions within nodes are sufficiently similar, and presenting data in the least aggregated  
11 form possible(29).  
12  
13  
14  
15  
16  
17  
18  
19

### 20 **Assessment of Risk of Bias**

21  
22 The risk of bias (ROB) of eligible studies will be assessed according to a modified version  
23 of the Cochrane Collaboration's ROB tool(18). The six criteria to be assessed are sequence  
24 generation, allocation concealment, blinding of participants, personnel and outcome assessors,  
25 completeness of follow up, selective outcome reporting, and presence of other biases. Each domain  
26 will be assigned a score 'definitely low risk', or 'definitely high risk' or 'unclear risk'. Two  
27 independent reviewers will assess the ROB. We will try to reach consensus when disagreements  
28 between two reviewers when assessing the methodological quality of the studies. Nevertheless, if  
29 consensus cannot be reached, a third reviewer will resolve it.  
30  
31  
32  
33  
34  
35  
36  
37

### 38 **Measures of Treatment Effect**

39  
40 Effect estimates along with 95% credible intervals (CrIs) will be estimated using risk ratios  
41 (RR) calculated using methods described by Dias, using the baseline risk parameter to convert  
42 odds ratios to risk ratios(29). When random effect models are used estimates will also be  
43 accompanied by their 95% predictive interval representing the interval within which we would  
44 expect the treatment effect of a future study to lie(30,31). Relative treatment rankings will be  
45 summarized using mean ranks with their 95% credible intervals and the Surface Under the  
46 Cumulative Ranking curve (SUCRA) values and cumulative probability rankograms(32).  
47 SUCRAs range from 0% to 100% with values of 100% representing a hypothetical treatment that  
48 is always best without uncertainty.  
49  
50  
51  
52  
53  
54  
55  
56  
57  
58  
59  
60



### Assessment of reporting bias

We will construct a comparison adjusted funnel plot for the network to assess the potential publication bias and small-study effects(33), if we retrieve at least 10 studies. We will inspect plots visually for evidence of asymmetry and if publication bias is suspected we will conduct a sensitivity analysis using models described by Mavridis, Welton and Salanti(34).

### Assessment of Transitivity Assumption

Clinical experts (GS, GP, SM) will assess trial characteristics using tables and visualizations to assess whether the transitivity assumption is likely to hold. The characteristics to be evaluated are those that are expected to be effect modifiers and will include gestational age, birth weight, baseline event risk, and ROB. These assessments will be made prior to any meta-analysis to limit to influence of presence or absence of statistical heterogeneity on the assessment of the transitivity assumption. The decision to pool data will be based on consensus. If it is determined that quantitative synthesis is inappropriate, we will summarize our findings narratively.

### Direct treatment comparisons

Given that we expect clinical and methodological heterogeneity among the studies (see below in Rating the Confidence in Estimates section), which in turn will create statistical heterogeneity, we will pool evidence for each treatment comparison using a Bayesian random-effects (RE) model(35). In comparison to the fixed-effect model (FE), the RE model is conservative in the sense that it accounts for both within- and between-study variability. The RE model assumes that the observed treatment effect for a study is a combination of a treatment effect common to all studies plus a component specific to that study alone(36,37). Models will be based on standard code modified to include minimally informative priors on baselines, treatment effects, and between trial heterogeneity (38). These priors generally provide more stable estimates, particularly in cases where data are sparse, will be developed using the approach described by Gabry *et al* (39,40).

### The Network Meta-Analysis

1  
2  
3 For each outcome, we will present the network diagram and a forest plot compared against  
4 the common comparator with the network estimates as well as league tables showing all pairwise  
5 comparisons. To capture the non-competing nature of interventions along the stabilization pathway  
6 and to directly fulfill the research objectives we will use component models as described by Welton  
7 *et al*(41). These models assume that interventions across domains of the stabilization pathway are  
8 additive on additive on logit scale for dichotomous outcomes (e.g. mortality). In the absence of  
9 direct evidence for a given comparison an indirect comparison will provide an estimate of the  
10 treatment effect. In the presence of direct evidence, the NMA will provide a combined estimate  
11 (i.e., direct and indirect evidence)(32). For instance, in a triangular network ABC composed by  
12 studies that directly compare A vs. B and A vs. C treatments, we can indirectly estimate the effect  
13 of B vs. C treatments. In case direct evidence of B vs. C treatment comparison is also available,  
14 then a combined estimate of direct and indirect evidence of B vs. C can be calculated using a  
15 NMA.  
16  
17  
18  
19  
20  
21  
22  
23  
24  
25

26 We will fit a Bayesian hierarchical model with weakly informative priors (i.e. normal with  
27 mean zero and standard deviation 5 for outcomes on the logit scale) adjusting for correlation of  
28 multi-arm trials, and assuming a common-within network heterogeneity variance (uniform on 0-  
29 2). We will assess heterogeneity by estimating the magnitude of the between-study variance (42).  
30 If the posterior estimate of between-study variance shows signs of prior dominance (e.g. extreme  
31 values and long tails, odds ratios approaching infinity), we will assess whether using the  
32 empirically estimated informative prior distribution described by Turner *et al*(43) provides more  
33 sensible estimates. If the network structure is such that estimates of credible intervals are  
34 sufficiently different from original trial estimates and lack clinical validity, we will also present  
35 results from a fixed effect model. In this case, we will caution against overinterpretation of credible  
36 intervals. Markov chains will be run for a sufficient number of iterations to reach convergence,  
37 which we will assess on the basis of the Brooks-Gelman-Rubin diagnostic, with values less than  
38 1.05 considered acceptable if consistent with visual inspection of convergence and time series  
39 plots(44). All analyses will be performed in JAGS or similar software via the statistical program  
40 R(45,46).  
41  
42  
43  
44  
45  
46  
47  
48  
49  
50  
51

### 52 53 **Assessment of Inconsistency** 54 55 56 57 58 59 60

1  
2  
3 Inconsistency is the statistical manifestation of the violation of the transitivity assumption,  
4 which presents as a disagreement between direct and indirect estimates (loop inconsistency),  
5 and/or inconsistency between studies that inform the same treatment comparison, but include a  
6 different number of treatment arms (design inconsistency). To evaluate both design and loop  
7 inconsistency, we will apply the design-by-treatment interaction model with random inconsistency  
8 effects (47,48). These findings will be interpreted within the context of the estimate of between-  
9 trial variance as these concepts are closely related and difficult to separate. For example, large  
10 estimates of between-trial variance are indicative of heterogeneity within direct comparisons but  
11 may also be the result of inconsistency between direct and indirect evidence.  
12  
13  
14  
15  
16  
17  
18  
19

### 20 **Exploration of heterogeneity and inconsistency**

21  
22 We will perform a network meta-regression using of potential effect modifiers to explore  
23 important heterogeneity and/or inconsistency. We propose, the following potential sources of  
24 heterogeneity, which could be possible effect modifiers: gestational age, birth weight and ROB.  
25 We hypothesize that lower gestational age, and low ROB will be related to less effectiveness of  
26 interventions. Overall risk of bias will be determined by taking the average of the three most  
27 important risk of bias items identified by expert consensus (sequence generation, allocation  
28 concealment, and blinding). Meta-regression models will assume a single shared coefficient for all  
29 non-baseline treatments(42). Interpretation of meta-regression models will be in keeping with  
30 suggestions from Dias et al., namely: (1) Inclusion of the coefficient leads to a decrease in the  
31 estimate of between-study variance; and (2) The 95% credible intervals of the estimated coefficient  
32 exclude the null (42).  
33  
34  
35  
36  
37  
38  
39  
40  
41  
42

### 43 **Sensitivity Analyses**

44 We plan to perform sensitivity analyses of different heterogeneity priors to assess the  
45 robustness of results(35,43,49). Further, findings from component models will be compared  
46 against a model without this assumption. In both cases, we will compare model fit using both  
47 absolute (residual deviance) and relative (DIC) measures as well as a qualitative assessment of  
48 whether the analysis leads to an important change in effect estimates.  
49  
50  
51  
52  
53  
54

### 55 **Rating the confidence in estimates of the effect**

1  
2  
3 We will assess the confidence in the estimates for each outcome using the GRADE  
4 approach (50). For this purpose, two authors will independently do the assessment. The  
5 confidence in the estimates will be based on four levels: high, moderate, low and very low. For  
6 the direct comparisons we will assess and rate each outcome based on the categories: ROB  
7 imprecision, inconsistency and publication bias(51-55). To assist with assessment of each  
8 domain, we will use threshold plots, which show the smallest change in study/contrast level  
9 estimates required to change the conclusions of the analysis.  
10  
11  
12  
13  
14

15 We will assess and rate the confidence in all the indirect comparisons –if available-  
16 obtained from first order loops following the GRADE categories used for assessing the direct  
17 comparisons in addition to the transitivity assessment. Transitivity, also called similarity(56), is  
18 the assumption that an indirect comparison is a valid method to compare two treatments that have  
19 not been compared in a head-to-head trial, because the studies are sufficiently similar in important  
20 clinical and methodological characteristics, or in other words, that they are similar in their  
21 distributions of effect modifiers(57,58). Then, we will rate the confidence in each NMA effect  
22 estimate using the higher rating when both direct and indirect evidence are present.  
23  
24  
25  
26  
27  
28

29 We will assess and rate the confidence in estimates of effect from the direct comparisons  
30 in our pairwise meta-analyses described previously. To rate the confidence in the indirect  
31 comparisons, we will focus our assessments on first-order loops (FOLs), i.e., loops connected to  
32 the interventions of interest through only one other intervention. For instance, if for A, B and C  
33 interventions, there are direct comparisons of A vs. B (AB) and B vs. C (BC), we will be able to  
34 indirectly estimate the effects of A vs. C (AC). The AC indirect estimation will be a FOL. We will  
35 choose the FOLs with the lowest variances for rating the confidence as they contribute the most to  
36 the estimates of effect.  
37  
38  
39  
40  
41  
42

43 Within FOLs, the indirect comparison confidence will be the lowest of the confidence  
44 ratings we have assigned to the contributing direct comparisons. For example, if we find that AB  
45 has moderate confidence and BC has high confidence, we will judge the associated indirect  
46 comparison, AC, as moderate confidence. We may rate down confidence in the indirect  
47 comparisons further if we have a strong suspicion that the transitivity assumption has been  
48 violated.  
49  
50  
51  
52

53 Our overall judgment of confidence in the NMA estimate for any pairwise comparison will  
54 be the higher of the confidence rating amongst the contributing direct and indirect comparisons.  
55  
56  
57  
58  
59  
60

1  
2  
3 However, we may rate down confidence in the network estimate if we find that the direct and  
4 indirect estimates have inconsistency. For this purpose, the GRADE approach recommends to  
5 assess the incoherence (or inconsistency as described in the 'The Network Meta-Analysis' section)  
6 criteria, which is defined as the differences between direct and indirect estimates of effect(59).  
7  
8  
9

### 10 11 12 **Multi-criteria Acceptability Analysis**

13 Network meta-analyses provide an estimate of effect estimates of competing interventions,  
14 but this alone is not sufficient to aid decision making. We will aim to supplement this review with  
15 a stochastic multi-criteria acceptability analysis using methods defined by Tervonen, and Van  
16 Valkenhoef(60). These methods use a partial value function to allow for a quantitative risk-benefit  
17 analysis across multiple outcomes, given an ordinal ranking of importance for decision making  
18 (e.g. Mortality > BPD). Based on the best fitting NMA model, we will conduct stochastic  
19 multicriteria acceptability analyses (SMAA): One without preference criteria, and a second with  
20 preference criteria determined by expert consensus. Since SMAA is based on estimates constrained  
21 to the interval [0,1] we will calculate absolute risk of outcomes based on either a suitably designed  
22 observational trial or, if unavailable, a pooled control arm risk of included studies in the reference  
23 treatment(61). If treatments require the tradeoff of common (e.g. BPD) and very rare (e.g.  
24 mortality) events, we will use the 95% credible interval hull approach(62). The outputs of the  
25 SMAA will be a rankogram outlining the probability that a treatment is best, second best, etc., a  
26 vector of central weights, a confidence factor for the preference free model; and the rankogram for  
27 the ordered model. The vector of central weights provides a summary of the implied preferences  
28 required to hold an *a priori* preference for one treatment or another (i.e. the outcome preference  
29 implied by a clinician's current practice). The confidence factor is the probability that a treatment  
30 is best given these preferences, and is used as a measure of uncertainty.  
31  
32  
33  
34  
35  
36  
37  
38  
39  
40  
41  
42  
43  
44  
45

### 46 **Discussion**

47 Interventions in the immediate postnatal period may have long-term clinical implications.  
48 This NMA will provide the relative effectiveness of commonly practiced delivery room  
49 interventions for preterm infants born <33 weeks of gestation in preventing BPD. To the best of  
50 our knowledge this will be the first review that will examine the relative effectiveness of each  
51 delivery room intervention individually and in combination with respect to important clinical  
52  
53  
54  
55  
56  
57  
58  
59

1  
2  
3 outcomes using novel statistical techniques. Its results will be of interest for a broad range of  
4 audience: practice guideline developers, pediatricians, neonatologists, policy makers and  
5 researchers, as it could be used to provide clinical recommendations for the choice of sequence of  
6 delivery room interventions.  
7  
8  
9

10 Our review will have several methodological strengths. First, we will implement a wide  
11 comprehensive search to include published randomized clinical trials in the most important  
12 databases, as well as unpublished work. Second, we will use the novel method for rating the  
13 confidence in the estimates recommended by the GRADE working group. Third, we will employ  
14 a novel SMAA model to determine the most effective sequence of delivery room interventions  
15 with respect to the most important clinical outcomes(60). On the other hand, we anticipate some  
16 methodological challenges while undertaking such a review. We anticipate some degree of clinical  
17 heterogeneity while considering such a large number of competing and non-competing delivery  
18 room interventions. Based on the number of interventions identified following the systematic  
19 review, we may have to lump interventions into single nodes or split a node into multiple nodes to  
20 generate clinically meaningful results.  
21  
22  
23  
24  
25  
26  
27  
28

29 We hope that this review will provide an evidence based guide to choosing the right  
30 sequence of early postnatal interventions that will be associated with the least likelihood of  
31 inducing lung injury and BPD in preterm infants.  
32  
33  
34  
35  
36  
37  
38  
39  
40  
41  
42  
43  
44  
45  
46  
47  
48  
49  
50  
51  
52  
53  
54  
55  
56  
57  
58  
59  
60

1  
2  
3  
4  
5  
6  
7  
8  
9  
10  
11  
12  
13  
14  
15  
16  
17  
18  
19  
20  
21  
22  
23  
24  
25  
26  
27  
28  
29  
30  
31  
32  
33  
34  
35  
36  
37  
38  
39  
40  
41  
42  
43  
44  
45  
46  
47  
48  
49  
50  
51  
52  
53  
54  
55  
56  
57  
58  
59  
60

**Figure legend:**

**Figure 1: Physiological sequence of potential delivery room interventions**

For peer review only

**Table 1. A priori defined outcome measures**

| Outcome Measure                        | Definition                                                                                                                                                                                                                                             |
|----------------------------------------|--------------------------------------------------------------------------------------------------------------------------------------------------------------------------------------------------------------------------------------------------------|
| Bronchopulmonary dysplasia             | No. of neonates who require oxygen at 36 weeks' postmenstrual age (PMA)                                                                                                                                                                                |
| Mortality                              | Death before discharge                                                                                                                                                                                                                                 |
| Severe intraventricular hemorrhage     | No. of neonates with grades 3-4 based on the Papile criteria                                                                                                                                                                                           |
| Air leak syndromes                     | No. of neonates with pneumothorax or pulmonary interstitial emphysema confirmed by chest X ray                                                                                                                                                         |
| Retinopathy of prematurity (any stage) | No. of neonates with any stage of Retinopathy of prematurity as per the international classification of Retinopathy of prematurity                                                                                                                     |
| Neurodevelopmental impairment          | No. of infants with any degree of neurodevelopmental impairment as assessed by a standardized and validated assessment tool, a child developmental specialist or both, at any age reported (outcome data grouped at 12, 18 and 24 months if available) |



## References

1. Bancalari E, Abdenour GE, Feller R, Gannon J. Bronchopulmonary dysplasia: clinical presentation. *Journal of Pediatrics* 1979;95(5 Pt 2):819-23.
2. Shennan AT, Dunn MS, Ohlsson A, Lennox K, Hoskins EM. Abnormal pulmonary outcomes in premature infants: prediction from oxygen requirement in the neonatal period. *Pediatrics* 1988;82(4):527-32.
3. Stoll BJ, Hansen NI, Bell EF, Walsh MC, Carlo WA, Shankaran S, Laptook AR, Sánchez PJ, Van Meurs KP, Wyckoff M, Das A, Hale EC, Ball MB, Newman NS, Schibler K, Poindexter BB, Kennedy KA, Cotten CM, Watterberg KL, D'Angio CT, DeMauro SB, Truog WE, Devaskar U, Higgins RD; Eunice Kennedy Shriver National Institute of Child Health and Human Development Neonatal Research Network. Trends in Care Practices, Morbidity, and Mortality of Extremely Preterm Neonates, 1993-2012. *JAMA*. 2015;314(10):1039-51.
4. Doyle LW, Faber B, Callanan C, Freezer N, Ford GW, Davis NM. Bronchopulmonary dysplasia in very low birth weight subjects and lung function in late adolescence. *Pediatrics* 2006; 118: 108–113.
5. Fawke J, Lum S, Kirkby J, Hennessy E, Marlow N, Rowell V et al. Lung function and respiratory symptoms at 11 years in children born extremely preterm: the Epicure study. *Am J Respir Crit Care Med* 2010; 182: 237–245.
6. Short EJ, Klein NK, Lewis BA, Fulton S, Eisengart S, Kercksmar C, Baley J, Singer LT. Cognitive and academic consequences of bronchopulmonary dysplasia and very low birth weight: 8-year-old outcomes. *Pediatrics*. 2003;112(5):e359
7. Twilhaar ES, Wade RM, de Kieviet JF, van Goudoever JB, van Elburg RM, Oosterlaan J. Cognitive Outcomes of Children Born Extremely or Very Preterm since the 1990s and

- 1  
2  
3 Associated Risk Factors: A Meta-analysis and Meta-regression. *JAMA Pediatr.*  
4 2018;172(4):361-367  
5  
6  
7  
8 8. Hillman NH, Moss TJM, Kallapur SG, Bachurski C, Pillow JJ, Polglase GR et al. Brief, large  
9 tidal volume ventilation initiates lung injury and a systemic response in fetal sheep. *Am J*  
10 *Respir Crit Care Med* 2007; 176: 575–581.  
11  
12  
13  
14 9. Wallace MJ, Probyn ME, Zahra VA, Crossley K, Cole TJ, Davis PG et al. Early biomarkers  
15 and potential mediators of ventilation-induced lung injury in very preterm lambs. *Respir Res*  
16 2009; 10: 19.  
17  
18  
19  
20  
21 10. Obladen M. Factors influencing surfactant composition in the newborn infant. *Eur J Pediatr*  
22 1978; 128: 129–143.  
23  
24  
25  
26 11. Heldt GP, McIlroy MB. Distortion of chest wall and work of diaphragm in preterm infants. *J*  
27 *Appl Physiol* (1985) 1987; 62: 164–169.  
28  
29  
30  
31 12. Heldt GP, McIlroy MB. Dynamics of chest wall in preterm infants. *J Appl Physiol* (1985)  
32 1987; 62: 170–174.  
33  
34  
35 13. Foglia EE, Jensen EA, Kirpalani H. State of the Art Review: Delivery room interventions to  
36 prevent bronchopulmonary dysplasia in extremely preterm infants. *Journal of perinatology :*  
37 *official journal of the California Perinatal Association.* 2017;37(11):1171-1179.  
38  
39  
40  
41  
42 14. Rich WD, Leone T, Finer NN. Delivery room intervention: improving the outcome. *Clin*  
43 *Perinatol.* 2010;37(1):189-202  
44  
45  
46  
47 15. Fogarty M, Osborn DA, Askie LM, et al. Delayed vs early umbilical cord clamping for preterm  
48 infants: a systematic review and meta-analysis. *The American Journal of Obstetrics &*  
49 *Gynecology* 2018;218:1–18.  
50  
51  
52  
53  
54  
55  
56  
57  
58  
59  
60

16. Schmölzer GM, Kumar M, Pichler G, et al. Non-invasive versus invasive respiratory support in preterm infants at birth: systematic review and meta-analysis. *BMJ* 2013;347:f5980
17. Pichler G, Urlesberger B, Schwabegger B, et al. Cerebral Oxygen Saturation to Guide Oxygen Delivery in Preterm Neonates for the Immediate Transition after Birth: A 2-Center Randomized Controlled Pilot Feasibility Trial. *J Pediatr* 2016;170:73–4.
18. Collaboration TC. The Cochrane Handbook for Systematic Reviews of Interventions Version 5.1.0. Higgins JPT, and Green, S., editor 2011.
19. Jansen JP, Crawford B, Bergman G, Stam W. Bayesian Meta-Analysis of Multiple Treatment Comparisons: An Introduction to Mixed Treatment Comparisons. *Value in Health*. 2008;11(5):956-64.
20. Jonas DE, Wilkins TM, Bangdiwala S, Bann CM, Morgan LC, Thaler KJ, Amick HR, Gartlehner G. Findings of Bayesian Mixed Treatment Comparison Meta-Analyses: Comparison and Exploration Using Real-World Trial Data and Simulation [Internet]. Rockville (MD): Agency for Healthcare Research and Quality (US); 2013 Feb. Available from <http://www.ncbi.nlm.nih.gov/books/NBK126109/> Accessed November 10, 2018.
21. Vento M, Cheung P-Y, Aguar M, et al. The first golden minutes of the extremely-low-gestational-age neonate: a gentle approach. *Neonatology* 2009;95:286–98.
22. Peleg B, Globus O, Granot M, et al. “Golden Hour” quality improvement intervention and short-term outcome among preterm infants. *J Perinatol* 2018;31:289.
23. Shah V, Hodgson K, Seshia M, et al. Golden hour management practices for infants <32 weeks gestational age in Canada. *Paediatr Child Health* 2018;23:70–6.

- 1  
2  
3  
4  
5  
6  
7  
8  
9  
10  
11  
12  
13  
14  
15  
16  
17  
18  
19  
20  
21  
22  
23  
24  
25  
26  
27  
28  
29  
30  
31  
32  
33  
34  
35  
36  
37  
38  
39  
40  
41  
42  
43  
44  
45  
46  
47  
48  
49  
50  
51  
52  
53  
54  
55  
56  
57  
58  
59  
60
24. Shamseer L, Moher D, Clarke M, Gherzi D, Liberati A, Petticrew M, Shekelle P, Stewart LA; PRISMA-P Group. Preferred reporting items for systematic review and meta-analysis protocols (PRISMA-P) 2015: elaboration and explanation. *BMJ*. 2015;350:g7647.
  25. Hutton B, Salanti G, Caldwell DM, Chaimani A, Schmid CH, Cameron C, et al. The PRISMA Extension Statement for Reporting of Systematic Reviews Incorporating Network Meta-analyses of Health Care Interventions: Checklist and Explanations. *Ann Intern Med*. 2015;162(11):777-84.
  26. Papile L-A, Burstein J, Burstein R, et al. Incidence and evolution of subependymal and intraventricular hemorrhage: a study of infants with birth weights less than 1,500 gm. *J Pediatr* 1978;92:529-34
  27. Covidence systematic review software, Veritas Health Innovation, Melbourne, Australia. Available at [www.covidence.org](http://www.covidence.org)
  28. PRISMA. Preferred Reporting Items for Systematic Reviews and Meta-Analyses [online]. [cited 2018 Accessed April 20]. Available from: <http://www.prisma-statement.org/statement.htm>
  29. Introduction to Evidence Synthesis. In: Network Meta-Analysis for Decision Making [Internet]. John Wiley & Sons, Ltd; 2018. p. 1-17. Available from: <https://onlinelibrary.wiley.com/doi/abs/10.1002/9781118951651.ch1>
  30. Riley RD, Higgins JP, Deeks JJ. Interpretation of random effects meta-analyses. *BMJ*. 2011;342.
  31. Higgins J, Thompson SG, Spiegelhalter DJ. A re-evaluation of random-effects meta-analysis. *Journal of the Royal Statistical Society: Series A (Statistics in Society)*. 2009;172(1):137-59.

- 1  
2  
3 32. Salanti G, Ades AE, Ioannidis JP. Graphical methods and numerical summaries for presenting  
4 results from multiple-treatment meta-analysis: an overview and tutorial. *Journal of clinical*  
5  
6 epidemiology. 2011;64(2):163-71.  
7  
8  
9  
10 33. Chaimani A, Higgins JPT, Mavridis D, Spyridonos P, Salanti G. Graphical Tools for Network  
11  
12 Meta-Analysis in STATA. *PLoS One*. 2013;8(10).  
13  
14  
15 34. Mavridis D, Welton NJ, Salanti G. A selection model for accounting for publication bias in a  
16  
17 full network meta-analysis. *Stat Med*. 2014;33:5399–412.  
18  
19  
20 35. Lambert PC, Sutton AJ, Burton PR, Abrams KR, Jones DR. How vague is vague? A simulation  
21  
22 study of the impact of the use of vague prior distributions in MCMC using WinBUGS.  
23  
24 *Statistics in medicine*. 2005;24(15):2401.  
25  
26  
27 36. Cornell JE, Mulrow CD, Localio R, Stack CB, Meibohm AR, Guallar E, et al. Random-Effects  
28  
29 Meta-analysis of Inconsistent Effects: A Time for Change. *Annals of Internal Medicine*.  
30  
31 2014;160(4):267-70.  
32  
33  
34 37. DerSimonian R, Laird N. Meta-analysis in clinical trials. *Controlled clinical trials*.  
35  
36 1986;7(3):177-88.  
37  
38  
39 38. Dias S, Sutton AJ, Ades AE, Welton NJ. Evidence Synthesis for Decision Making 2: A  
40  
41 Generalized Linear Modeling Framework for Pairwise and Network Meta-analysis of  
42  
43 Randomized Controlled Trials. *Med Decis Mak*. 2013;33:607.  
44  
45  
46 39. Gelman A, Carlin J, Stern H, Dunson D, Vehtari A, Rubin D. Chapter 2: Single Parameter  
47  
48 models. In: *Bayesian data analysis*. Third Edit. New York: CRC Press; 2015.  
49  
50  
51 40. Gabry J, Simpson D, Vehtari A, Betancourt M, Gelman A. Visualization in Bayesian  
52  
53 workflow. 2017;2. <http://arxiv.org/abs/1709.01449>.  
54  
55  
56  
57  
58  
59  
60

- 1  
2  
3  
4  
5  
6  
7  
8  
9  
10  
11  
12  
13  
14  
15  
16  
17  
18  
19  
20  
21  
22  
23  
24  
25  
26  
27  
28  
29  
30  
31  
32  
33  
34  
35  
36  
37  
38  
39  
40  
41  
42  
43  
44  
45  
46  
47  
48  
49  
50  
51  
52  
53  
54  
55  
56  
57  
58  
59  
60
41. Welton NJ, Caldwell DM, Adamopoulos E, Vedhara K. Mixed treatment comparison meta-analysis of complex interventions: Psychological interventions in coronary heart disease. *Am J Epidemiol*. 2009;169:1158–65.
  42. Dias S, Welton NJ, Sutton AJ, Ades AE. Evidence Synthesis for Decision Making 3: Subgroups, Meta-Regression, Bias, and Bias-Adjustment. *Med Decis Mak* [Internet]. 2013;33(5):597–606. Available from: <http://mdm.sagepub.com/content/33/5/597.full.pdf+html> Accessed November 10, 2018
  43. Turner RM, Davey J, Clarke MJ, Thompson SG, Higgins JP. Predicting the extent of heterogeneity in meta-analysis, using empirical data from the Cochrane Database of Systematic Reviews. *International journal of epidemiology*. 2012;41(3):818-27.
  44. Gelman A, Rubin DB. Inference from iterative simulation using multiple sequences. *Statistical science*. 1992:457-72.
  45. Plummer, M., 2016. JAGS: Just another Gibbs sampler. Available at <http://mcmc-jags.sourceforge.net/>. Accessed March, 14, 2017.
  46. R Core Team. R: A language and environment for statistical computing. 2018. <https://cran.r-project.org/>.
  47. Dias S, Welton NJ, Sutton AJ, Caldwell DM, Lu G, Ades a E. Evidence synthesis for decision making 4: inconsistency in networks of evidence based on randomized controlled trials. *Med Decis Making* [Internet]. 2013;33(5):641–56.
  48. Jackson D, Barrett JK, Rice S, White IR, Higgins JPT. A design-by-treatment interaction model for network meta-analysis with random inconsistency effects. *Stat Med*. 2014;33:3639–54.

- 1  
2  
3 49. Rhodes KM, Turner RM, Higgins JP. Predictive distributions were developed for the extent of  
4  
5 heterogeneity in meta-analyses of continuous outcome data. *J Clin Epidemiol*. 2015;68(1):52-  
6  
7 60.  
8  
9
- 10 50. Guyatt G, Oxman AD, Akl EA, Kunz R, Vist G, Brozek J, et al. GRADE guidelines: 1.  
11  
12 Introduction—GRADE evidence profiles and summary of findings tables. *Journal of clinical*  
13  
14 *epidemiology*. 2011;64(4):383-94.  
15  
16
- 17 51. Balshem H, Helfand M, Schünemann HJ, Oxman AD, Kunz R, Brozek J, et al. GRADE  
18  
19 guidelines: 3. Rating the quality of evidence. *Journal of clinical epidemiology*.  
20  
21 2011;64(4):401-6.  
22  
23
- 24 52. Guyatt GH, Oxman AD, Vist G, Kunz R, Brozek J, Alonso-Coello P, et al. GRADE guidelines:  
25  
26 4. Rating the quality of evidence—study limitations (risk of bias). *Journal of clinical*  
27  
28 *epidemiology*. 2011;64(4):407-15.  
29  
30
- 31 53. Guyatt GH, Oxman AD, Kunz R, Brozek J, Alonso-Coello P, Rind D, et al. GRADE guidelines  
32  
33 6. Rating the quality of evidence—imprecision. *Journal of clinical epidemiology*.  
34  
35 2011;64(12):1283-93.  
36  
37
- 38 54. Guyatt GH, Oxman AD, Kunz R, Woodcock J, Brozek J, Helfand M, et al. GRADE guidelines:  
39  
40 7. Rating the quality of evidence—inconsistency. *Journal of clinical epidemiology*.  
41  
42 2011;64(12):1294-302.  
43  
44
- 45 55. Guyatt GH, Oxman AD, Montori V, Vist G, Kunz R, Brozek J, et al. GRADE guidelines: 5.  
46  
47 Rating the quality of evidence—publication bias. *Journal of clinical epidemiology*.  
48  
49 2011;64(12):1277-82.  
50  
51
- 52 56. Donegan S, Williamson P, Gamble C, Tudur-Smith C. Indirect comparisons: a review of  
53  
54 reporting and methodological quality. *PLoS One*. 2010;5(11):e11054.  
55  
56  
57  
58  
59  
60

- 1  
2  
3 57. Baker SG, Kramer BS. The transitive fallacy for randomized trials: if A bests B and B bests C  
4 in separate trials, is A better than C? *BMC Med Res Methodol.* 2002;2:13.  
5  
6  
7  
8 58. Cipriani A, Higgins JP, Geddes JR, Salanti G. Conceptual and technical challenges in network  
9 meta-analysis. *Annals of internal medicine.* 2013;159(2):130-7.  
10  
11  
12 59. Puhan MA, Schunemann HJ, Murad MH, Li T, Brignardello-Petersen R, Singh JA, et al. A  
13 GRADE Working Group approach for rating the quality of treatment effect estimates from  
14 network meta-analysis. *BMJ.* 2014;349:g5630.  
15  
16  
17  
18 60. Van Valkenhoef G, Tervonen T, Zhao J, De Brock B, Hillege HL, Postmus D. Multicriteria  
19 benefit-risk assessment using network meta-analysis. *J Clin Epidemiol.* 2012;65:394–403.  
20  
21  
22 61. Dias S, Welton NJ, Sutton AJ, Ades AE. Evidence synthesis for decision making 5: The  
23 baseline natural history model. *Med Decis Mak.* 2013;33(5):657–70.  
24  
25  
26  
27  
28 62. Tervonen T. New directions in Stochastic Multicriteria Acceptability Analysis. 2007 Dec 1  
29 [cited 2018 Nov 11]; Available from: <http://www.utupub.fi/handle/10024/28151>  
30  
31  
32  
33  
34  
35  
36  
37  
38  
39  
40  
41  
42  
43  
44  
45  
46  
47  
48  
49  
50  
51  
52  
53  
54  
55  
56  
57  
58  
59  
60



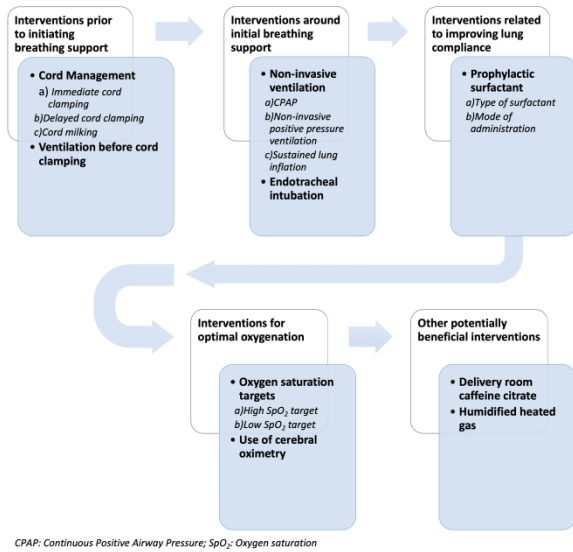

Figure 1: Physiological sequence of potential delivery room interventions

903x508mm (144 x 144 DPI)

## Appendix 1: Search strategy for EMBASE, Medline, and PubMed

### EMBASE

(newborn OR infant OR neonate OR preterm OR premature) AND [randomized controlled trial]/lim

AND

(continuous AND positive AND airway AND pressure OR cpap OR (nasal AND continuous AND positive AND airway AND pressure) OR ncpap OR (positive AND pressure AND ventilation) OR (intermittent AND positive AND pressure AND ventilation) OR (sustained AND lung AND inflation) OR (sustained AND inflation) OR si) AND [randomized controlled trial]/lim

OR

(supplemental AND oxygen OR (supplemental AND oxygen AND during AND resuscitation) OR oxygen OR surfactant OR (surfactant AND administration) OR (surfactant AND administration, AND early) OR (surfactant AND administration, AND late) OR (minimally AND invasive AND surfactant AND therapy) OR ('less invasive' AND surfactant AND administration)) AND [randomized controlled trial]/lim

OR

(lisa OR intubation OR (endotracheal AND intubation) OR (mechanical AND ventilation) OR caffeine OR (caffeine AND citrate) OR (respiratory AND function AND monitor) OR (delayed AND cord AND clamping) OR (cord AND milking)) AND [randomized controlled trial]/lim

AND

(randomized AND controlled AND trial OR 'randomized controlled trial':it OR (clinical AND trial)) AND [randomized controlled trial]/lim

AND

[randomized controlled trial]/lim AND [embase]/lim AND ([embryo]/lim OR [fetus]/lim OR [newborn]/lim OR [infant]/lim)

Limited to embryo from Age Groups fetus from Age Groups newborn from Age Groups infant from Age Groups

## Medline

| Set | <input type="button" value="Run Search"/> <b>MEDLINE</b><br>Search History - " BPD"                                                                                                                                                                                                                                                                                                                                                                                                                                                                                                                                                                                                                                                                                                                                                                             |
|-----|-----------------------------------------------------------------------------------------------------------------------------------------------------------------------------------------------------------------------------------------------------------------------------------------------------------------------------------------------------------------------------------------------------------------------------------------------------------------------------------------------------------------------------------------------------------------------------------------------------------------------------------------------------------------------------------------------------------------------------------------------------------------------------------------------------------------------------------------------------------------|
| #5  | #3 AND #2 AND #1<br>Refined by: <b>PUBLICATION TYPES:</b> (RANDOMIZED CONTROLLED TRIAL)<br><i>DocType=All document types; Language=All languages;</i>                                                                                                                                                                                                                                                                                                                                                                                                                                                                                                                                                                                                                                                                                                           |
| #4  | #3 AND #2 AND #1<br><i>DocType=All document types; Language=All languages;</i>                                                                                                                                                                                                                                                                                                                                                                                                                                                                                                                                                                                                                                                                                                                                                                                  |
| #3  | (MH=randomized controlled trial OR TS=randomized controlled trial OR TS=clinical trial) AND <b>DOCUMENT TYPES:</b> (Randomized Controlled Trial)<br><i>DocType=All document types; Language=All languages;</i>                                                                                                                                                                                                                                                                                                                                                                                                                                                                                                                                                                                                                                                  |
| #2  | TS=continuous positive airway pressure OR TS=CPAP OR TS=nasal continuous positive airway pressure OR TS=nCPAP OR TS=positive pressure ventilation OR TS=intermittent positive pressure ventilation OR TS=sustained lung inflation OR TS=sustained inflation OR TS=SI OR TS=supplemental oxygen OR TS=supplemental oxygen during resuscitation OR TS=oxygen OR TS=surfactant OR TS=surfactant administration OR TS=surfactant administration, early OR TS=surfactant administration, late OR TS=minimally invasive surfactant therapy OR TS=less-invasive surfactant administration OR TS=LISA OR TS=intubation OR TS=endotracheal intubation OR TS=mechanical ventilation OR TS=caffeine OR TS=caffeine citrate OR TS=respiratory function monitor OR TS=delayed cord clamping OR TS=cord milking<br><i>DocType=All document types; Language=All languages;</i> |
| #1  | TS=newborn OR TS=premature OR TS=infant OR TS=neonate OR TS=preterm<br><i>DocType=All document types; Language=All languages;</i>                                                                                                                                                                                                                                                                                                                                                                                                                                                                                                                                                                                                                                                                                                                               |

## PubMed

- #1 MeSH descriptor: [Infant] explode all trees
- #2 infant\*:ti,ab
- #3 neonat\*:ti,ab
- #4 newborn\*:ti,ab
- #5 preterm:ti,ab
- #6 premature:ti,ab
- #7 #1 or #2 or #3 or #4 or #5 or #6
- #8 "continuous positive airway pressure":ti,ab
- #9 "positive pressure ventilation":ti,ab
- #10 (sustained near/2 inflation):ti,ab
- #11 (supplemental near/2 oxygen):ti,ab
- #12 oxygen:ti,ab
- #13 surfactant:ti,ab
- #14 intubation:ti,ab
- #15 (mechanical\* near/1 ventilat\*):ti,ab
- #16 caffeine:ti,ab
- #17 "respiratory function monitor":ti,ab
- #18 (cord near/2 ((clamping and delayed) or milking)):ti,ab
- #19 #8 or #9 or #10 or #11 or #12 or #13 or #14 or #15 or #16 or #17 or #18

1  
2  
3 #20 #7 and #19  
4  
5  
6  
7  
8  
9  
10  
11  
12  
13  
14  
15  
16  
17  
18  
19  
20  
21  
22  
23  
24  
25  
26  
27  
28  
29  
30  
31  
32  
33  
34  
35  
36  
37  
38  
39  
40  
41  
42  
43  
44  
45  
46  
47  
48  
49  
50  
51  
52  
53  
54  
55  
56  
57  
58  
59  
60

For peer review only

## PRISMA-P 2015 Checklist

This checklist has been adapted for use with protocol submissions to *Systematic Reviews* from Table 3 in Moher D et al: Preferred reporting items for systematic review and meta-analysis protocols (PRISMA-P) 2015 statement. *Systematic Reviews* 2015 4:1

| Section/topic                     | #  | Checklist item                                                                                                                                                                                  | Information reported                |                          | Line number(s) |
|-----------------------------------|----|-------------------------------------------------------------------------------------------------------------------------------------------------------------------------------------------------|-------------------------------------|--------------------------|----------------|
|                                   |    |                                                                                                                                                                                                 | Yes                                 | No                       |                |
| <b>ADMINISTRATIVE INFORMATION</b> |    |                                                                                                                                                                                                 |                                     |                          |                |
| <b>Title</b>                      |    |                                                                                                                                                                                                 |                                     |                          |                |
| Identification                    | 1a | Identify the report as a protocol of a systematic review                                                                                                                                        | <input checked="" type="checkbox"/> | <input type="checkbox"/> | 1              |
| Update                            | 1b | If the protocol is for an update of a previous systematic review, identify as such                                                                                                              | <input type="checkbox"/>            | <input type="checkbox"/> | N/A            |
| <b>Registration</b>               | 2  | If registered, provide the name of the registry (e.g., PROSPERO) and registration number in the Abstract                                                                                        | <input checked="" type="checkbox"/> | <input type="checkbox"/> | 113-114        |
| <b>Authors</b>                    |    |                                                                                                                                                                                                 |                                     |                          |                |
| Contact                           | 3a | Provide name, institutional affiliation, and e-mail address of all protocol authors; provide physical mailing address of corresponding author                                                   | <input checked="" type="checkbox"/> | <input type="checkbox"/> | 15             |
| Contributions                     | 3b | Describe contributions of protocol authors and identify the guarantor of the review                                                                                                             | <input checked="" type="checkbox"/> | <input type="checkbox"/> | 3              |
| <b>Amendments</b>                 | 4  | If the protocol represents an amendment of a previously completed or published protocol, identify as such and list changes; otherwise, state plan for documenting important protocol amendments | <input type="checkbox"/>            | <input type="checkbox"/> | N/A            |
| <b>Support</b>                    |    |                                                                                                                                                                                                 |                                     |                          |                |
| Sources                           | 5a | Indicate sources of financial or other support for the review                                                                                                                                   | <input checked="" type="checkbox"/> | <input type="checkbox"/> | 36-42          |
| Sponsor                           | 5b | Provide name for the review funder and/or sponsor                                                                                                                                               | <input checked="" type="checkbox"/> | <input type="checkbox"/> | 36-42          |
| Role of sponsor/funder            | 5c | Describe roles of funder(s), sponsor(s), and/or institution(s), if any, in developing the protocol                                                                                              | <input checked="" type="checkbox"/> | <input type="checkbox"/> | 36-42          |
| <b>INTRODUCTION</b>               |    |                                                                                                                                                                                                 |                                     |                          |                |
| <b>Rationale</b>                  | 6  | Describe the rationale for the review in the context of what is already known                                                                                                                   | <input checked="" type="checkbox"/> | <input type="checkbox"/> | 135-190        |
| <b>Objectives</b>                 | 7  | Provide an explicit statement of the question(s) the review will address with reference to participants, interventions, comparators, and outcomes (PICO)                                        | <input checked="" type="checkbox"/> | <input type="checkbox"/> | 192-195        |
| <b>METHODS</b>                    |    |                                                                                                                                                                                                 |                                     |                          |                |

| Section/topic                             | #   | Checklist item                                                                                                                                                                                                                              | Information reported                |                          | Line number(s) |
|-------------------------------------------|-----|---------------------------------------------------------------------------------------------------------------------------------------------------------------------------------------------------------------------------------------------|-------------------------------------|--------------------------|----------------|
|                                           |     |                                                                                                                                                                                                                                             | Yes                                 | No                       |                |
| <b>Eligibility criteria</b>               | 8   | Specify the study characteristics (e.g., PICO, study design, setting, time frame) and report characteristics (e.g., years considered, language, publication status) to be used as criteria for eligibility for the review                   | <input checked="" type="checkbox"/> | <input type="checkbox"/> | 222-247        |
| <b>Information sources</b>                | 9   | Describe all intended information sources (e.g., electronic databases, contact with study authors, trial registers, or other grey literature sources) with planned dates of coverage                                                        | <input checked="" type="checkbox"/> | <input type="checkbox"/> | 205-220        |
| <b>Search strategy</b>                    | 10  | Present draft of search strategy to be used for at least one electronic database, including planned limits, such that it could be repeated                                                                                                  | <input checked="" type="checkbox"/> | <input type="checkbox"/> | 205-220        |
| <b>STUDY RECORDS</b>                      |     |                                                                                                                                                                                                                                             |                                     |                          |                |
| Data management                           | 11a | Describe the mechanism(s) that will be used to manage records and data throughout the review                                                                                                                                                | <input checked="" type="checkbox"/> | <input type="checkbox"/> | 275-282        |
| Selection process                         | 11b | State the process that will be used for selecting studies (e.g., two independent reviewers) through each phase of the review (i.e., screening, eligibility, and inclusion in meta-analysis)                                                 | <input checked="" type="checkbox"/> | <input type="checkbox"/> | 263-273        |
| Data collection process                   | 11c | Describe planned method of extracting data from reports (e.g., piloting forms, done independently, in duplicate), any processes for obtaining and confirming data from investigators                                                        | <input checked="" type="checkbox"/> | <input type="checkbox"/> | 275-282        |
| <b>Data items</b>                         | 12  | List and define all variables for which data will be sought (e.g., PICO items, funding sources), any pre-planned data assumptions and simplifications                                                                                       | <input checked="" type="checkbox"/> | <input type="checkbox"/> | 249-256        |
| <b>Outcomes and prioritization</b>        | 13  | List and define all outcomes for which data will be sought, including prioritization of main and additional outcomes, with rationale                                                                                                        | <input checked="" type="checkbox"/> | <input type="checkbox"/> | 249-256        |
| <b>Risk of bias in individual studies</b> | 14  | Describe anticipated methods for assessing risk of bias of individual studies, including whether this will be done at the outcome or study level, or both; state how this information will be used in data synthesis                        | <input checked="" type="checkbox"/> | <input type="checkbox"/> | 300-308        |
| <b>DATA</b>                               |     |                                                                                                                                                                                                                                             |                                     |                          |                |
| <b>Synthesis</b>                          | 15a | Describe criteria under which study data will be quantitatively synthesized                                                                                                                                                                 | <input checked="" type="checkbox"/> | <input type="checkbox"/> | 310-446        |
|                                           | 15b | If data are appropriate for quantitative synthesis, describe planned summary measures, methods of handling data, and methods of combining data from studies, including any planned exploration of consistency (e.g., $I^2$ , Kendall's tau) | <input checked="" type="checkbox"/> | <input type="checkbox"/> | 310-446        |
|                                           | 15c | Describe any proposed additional analyses (e.g., sensitivity or subgroup analyses, meta-regression)                                                                                                                                         | <input checked="" type="checkbox"/> | <input type="checkbox"/> | 310-446        |
|                                           | 15d | If quantitative synthesis is not appropriate, describe the type of summary planned                                                                                                                                                          | <input checked="" type="checkbox"/> | <input type="checkbox"/> | 310-446        |
| <b>Meta-bias(es)</b>                      | 16  | Specify any planned assessment of meta-bias(es) (e.g., publication bias across studies, selective reporting within studies)                                                                                                                 | <input checked="" type="checkbox"/> | <input type="checkbox"/> | 448-466        |
| <b>Confidence in cumulative evidence</b>  | 17  | Describe how the strength of the body of evidence will be assessed (e.g., GRADE)                                                                                                                                                            | <input checked="" type="checkbox"/> | <input type="checkbox"/> | 411-446        |
