# Supplementary material for: Delivery room interventions to prevent bronchopulmonary dysplasia in preterm infants: a protocol for a systematic review and network meta-analysis
Source: PubMed Central journal article supplement — BMJ Open. 2019 Aug 18;9(8):e028066. doi: 10.1136/bmjopen-2018-028066 (PMC6701811; doi:10.1136/bmjopen-2018-028066), 2019-08-18
Supplement: bmjopen-2018-028066supp001.pdf [file bmjopen-2018-028066supp001.pdf]

**Appendix 1: Search strategy for EMBASE, Medline, and PubMed****EMBASE**

(newborn OR infant OR neonate OR preterm OR premature) AND [randomized controlled trial]/lim

AND

(continuous AND positive AND airway AND pressure OR cpap OR (nasal AND continuous AND positive AND airway AND pressure) OR ncpap OR (positive AND pressure AND ventilation) OR (intermittent AND positive AND pressure AND ventilation) OR (sustained AND lung AND inflation) OR (sustained AND inflation) OR si) AND [randomized controlled trial]/lim

OR

(supplemental AND oxygen OR (supplemental AND oxygen AND during AND resuscitation) OR oxygen OR surfactant OR (surfactant AND administration) OR (surfactant AND administration, AND early) OR (surfactant AND administration, AND late) OR (minimally AND invasive AND surfactant AND therapy) OR ('less invasive' AND surfactant AND administration)) AND [randomized controlled trial]/lim

OR

(lisa OR intubation OR (endotracheal AND intubation) OR (mechanical AND ventilation) OR caffeine OR (caffeine AND citrate) OR (respiratory AND function AND monitor) OR (delayed AND cord AND clamping) OR (cord AND milking)) AND [randomized controlled trial]/lim

AND

(randomized AND controlled AND trial OR 'randomized controlled trial':it OR (clinical AND trial)) AND [randomized controlled trial]/lim

AND

[randomized controlled trial]/lim AND [embase]/lim AND ([embryo]/lim OR [fetus]/lim OR [newborn]/lim OR [infant]/lim)

Limited to embryo from Age Groups fetus from Age Groups newborn from Age Groups infant from Age Groups

## Medline

| Set | Run Search | MEDLINE<br>Search History - " BPD"                                                                                                                                                                                                                                                                                                                                                                                                                                                                                                                                                                                                                                                                                                                                                                                                                              |
|-----|------------|-----------------------------------------------------------------------------------------------------------------------------------------------------------------------------------------------------------------------------------------------------------------------------------------------------------------------------------------------------------------------------------------------------------------------------------------------------------------------------------------------------------------------------------------------------------------------------------------------------------------------------------------------------------------------------------------------------------------------------------------------------------------------------------------------------------------------------------------------------------------|
| #5  |            | #3 AND #2 AND #1<br>Refined by: PUBLICATION TYPES: (RANDOMIZED CONTROLLED TRIAL)<br><i>DocType=All document types; Language=All languages;</i>                                                                                                                                                                                                                                                                                                                                                                                                                                                                                                                                                                                                                                                                                                                  |
| #4  |            | #3 AND #2 AND #1<br><i>DocType=All document types; Language=All languages;</i>                                                                                                                                                                                                                                                                                                                                                                                                                                                                                                                                                                                                                                                                                                                                                                                  |
| #3  |            | (MH=randomized controlled trial OR TS=randomized controlled trial OR TS=clinical trial) AND DOCUMENT TYPES: (Randomized Controlled Trial)<br><i>DocType=All document types; Language=All languages;</i>                                                                                                                                                                                                                                                                                                                                                                                                                                                                                                                                                                                                                                                         |
| #2  |            | TS=continuous positive airway pressure OR TS=CPAP OR TS=nasal continuous positive airway pressure OR TS=nCPAP OR TS=positive pressure ventilation OR TS=intermittent positive pressure ventilation OR TS=sustained lung inflation OR TS=sustained inflation OR TS=SI OR TS=supplemental oxygen OR TS=supplemental oxygen during resuscitation OR TS=oxygen OR TS=surfactant OR TS=surfactant administration OR TS=surfactant administration, early OR TS=surfactant administration, late OR TS=minimally invasive surfactant therapy OR TS=less-invasive surfactant administration OR TS=LISA OR TS=intubation OR TS=endotracheal intubation OR TS=mechanical ventilation OR TS=caffeine OR TS=caffeine citrate OR TS=respiratory function monitor OR TS=delayed cord clamping OR TS=cord milking<br><i>DocType=All document types; Language=All languages;</i> |
| #1  |            | TS=newborn OR TS=premature OR TS=infant OR TS=neonate OR TS=preterm<br><i>DocType=All document types; Language=All languages;</i>                                                                                                                                                                                                                                                                                                                                                                                                                                                                                                                                                                                                                                                                                                                               |

## PubMed

- #1 MeSH descriptor: [Infant] explode all trees
- #2 infant\*:ti,ab
- #3 neonat\*:ti,ab
- #4 newborn\*:ti,ab
- #5 preterm:ti,ab
- #6 premature:ti,ab
- #7 #1 or #2 or #3 or #4 or #5 or #6
- #8 "continuous positive airway pressure":ti,ab
- #9 "positive pressure ventilation":ti,ab
- #10 (sustained near/2 inflation):ti,ab
- #11 (supplemental near/2 oxygen):ti,ab
- #12 oxygen:ti,ab
- #13 surfactant:ti,ab
- #14 intubation:ti,ab
- #15 (mechanical\* near/1 ventilat\*):ti,ab
- #16 caffeine:ti,ab
- #17 "respiratory function monitor":ti,ab
- #18 (cord near/2 ((clamping and delayed) or milking)):ti,ab
- #19 #8 or #9 or #10 or #11 or #12 or #13 or #14 or #15 or #16 or #17 or #18

#20 #7 and #19
